# Supplementary material for: Comprehensive transcriptome analysis of cochlear spiral ganglion neurons at multiple ages
Source: eLife. 2020 Jan 8;9:e50491. doi: 10.7554/eLife.50491 (PMC7299348; doi:10.7554/eLife.50491)
Supplement: Figure 1—figure supplement 1—source data 1. [file elife-50491-fig1-figsupp1-data1.xlsx]

## Sheet: Sheet1
Figure 1-figure supplement 1A-A'			Mafb
SGN-E15.5	SGN-P1	SGN-P14	SGN-P30	Glia-P8
3287.44	1790.42	90.67	36.65	0.72
6078.15	2235.03	379.01	79.12	1.35
1986.59	977.36	227.97	97.19	1
Figure 1-figure supplement 1B			Sox10
SGN-E15.5	SGN-P1	SGN-P14	SGN-P30	Glia-P8
0.21	0.011	0.015	0.00087	2050
0.52	0.0032	7.93	0.0024	1700
0.24	1.03	68.94	3.65	2300
Figure 1-figure supplement 1C			Myosin-VI
SGN-E15.5	SGN-P1	SGN-P14	SGN-P30	HC-P12
2.49	2.19	0.31	0.39	59.75
0.22	0.85	0.78	0.12	67.5
3.75	0.82	0.23	0.33	70
