# Supplementary material for: Comprehensive transcriptome analysis of cochlear spiral ganglion neurons at multiple ages
Source: eLife. 2020 Jan 8;9:e50491. doi: 10.7554/eLife.50491 (PMC7299348; doi:10.7554/eLife.50491)
Supplement: Figure 1—source data 1. [file elife-50491-fig1-data1.xlsx]

## Sheet: Figure 1
Figure 1D	Mafb
	SGN_P8	Glia_P8
	902	0.72
	1145	1.35
	625	1
Figure 1E	Sox10
	SGN_P8	Glia_P8
	0.02	2050
	0.036	1700
	0.014	2300
Figure 1F	Myosin-VI
	SGN_P8	HC_P12
	1.44	59.75
	0.6	67.5
	0.75	70
