# Supplementary material for: Comprehensive transcriptome analysis of cochlear spiral ganglion neurons at multiple ages
Source: eLife. 2020 Jan 8;9:e50491. doi: 10.7554/eLife.50491 (PMC7299348; doi:10.7554/eLife.50491)
Supplement: Figure 2—source data 1. [file elife-50491-fig2-data1.xlsx]

## Sheet: Sheet1
Figure 2C
	Celf4 gene				Scrt2 gene
SGN-E15.5	29.7	10.4	26.8		49.8	31.9	61.9
SGN-P1	30.1	27.9	60.6		100.7	80.4	87.5
SGN-P8	55	73.8	31.5		74.6	70.4	46.5
SGN-P14	87.6	16.2	162.1		82.4	36.9	79.4
SGN-P30	94.3	94.6	86.9		67.8	54.6	33.3
Figure 2D
SGN-E15.5	SGN-P1	SGN-P8	SGN-P14	SGN-P30
0.93	1.76	0.67	0.91	3.99
1.05	0.46	1.37	0.8	2.57
1.02	3.54	2.56	1.67	3.9
