# Supplementary material for: Comprehensive transcriptome analysis of cochlear spiral ganglion neurons at multiple ages
Source: eLife. 2020 Jan 8;9:e50491. doi: 10.7554/eLife.50491 (PMC7299348; doi:10.7554/eLife.50491)
Supplement: Figure 6—figure supplement 2—source data 1. [file elife-50491-fig6-figsupp2-data1.xlsx]

## Sheet: Sheet1
Figure 6-figure supplement 2F
Basal	Middle	Apical
11.35	4.81	0.42
16.48	3.05	1.38
15.05	7.25	0
