# Supplementary material for: Comprehensive transcriptome analysis of cochlear spiral ganglion neurons at multiple ages
Source: eLife. 2020 Jan 8;9:e50491. doi: 10.7554/eLife.50491 (PMC7299348; doi:10.7554/eLife.50491)
Supplement: Figure 6—source data 1. [file elife-50491-fig6-data1.xlsx]

## Sheet: Sheet1
Figure 6K
Base	Middle	Apex
57.5	41.24	25.71
67.69	48.31	49.44
32.08	31.78	25.34
Figure 6L
Base	Middle	Apex
36.84	46.88	40
39.47	41.53	22.58
41.75	44.72	34.78
Figure 6M
Base	Middle	Apex
30.77	25.74	21.21
14.29	9.09	13.54
19.32	12.94	4.29
