# Supplementary material for: Comprehensive transcriptome analysis of cochlear spiral ganglion neurons at multiple ages
Source: eLife journal article supplement (doi:10.7554/elife.50491), 2020-01-08

Figure 4-figure supplement 3

Tdtomato + Hoechst

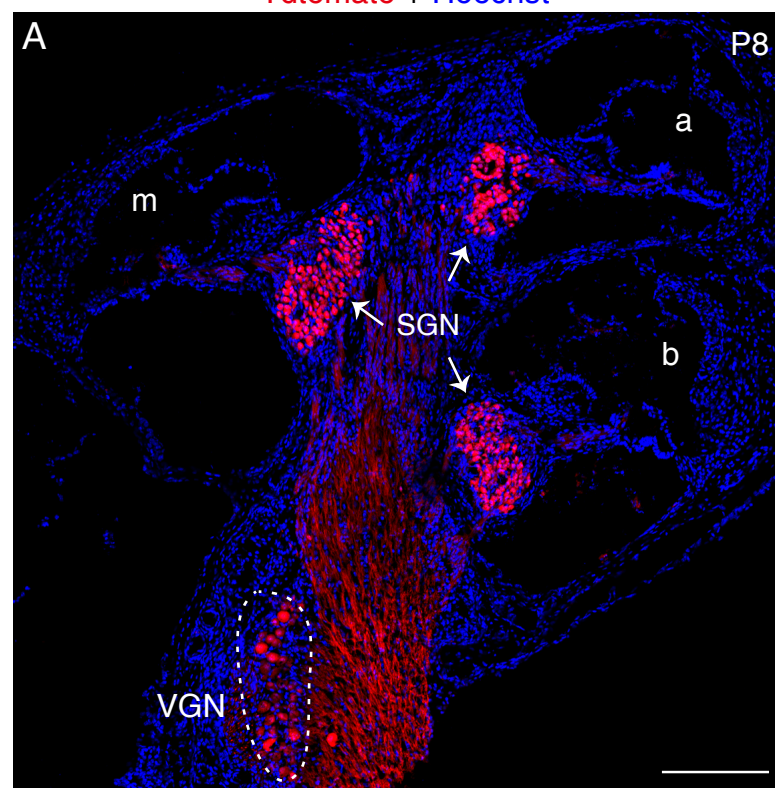

Tdtomato

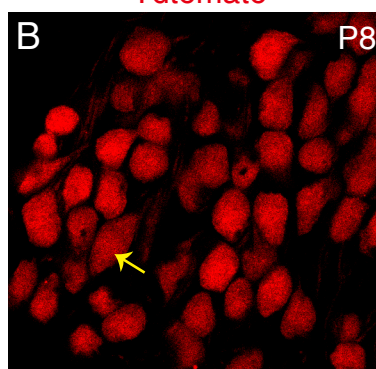

Map2

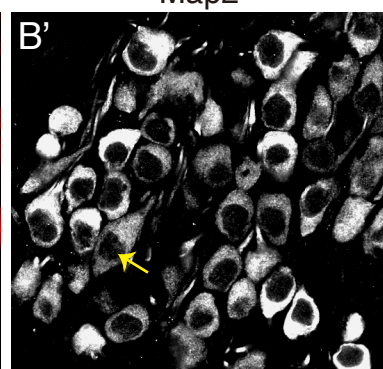

Sox10

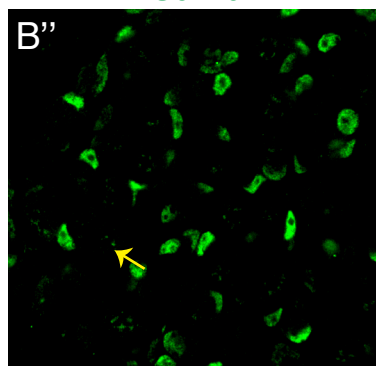

Merge + Hoechst

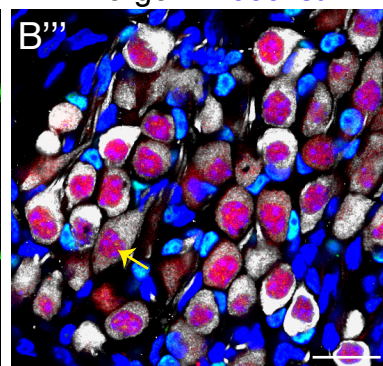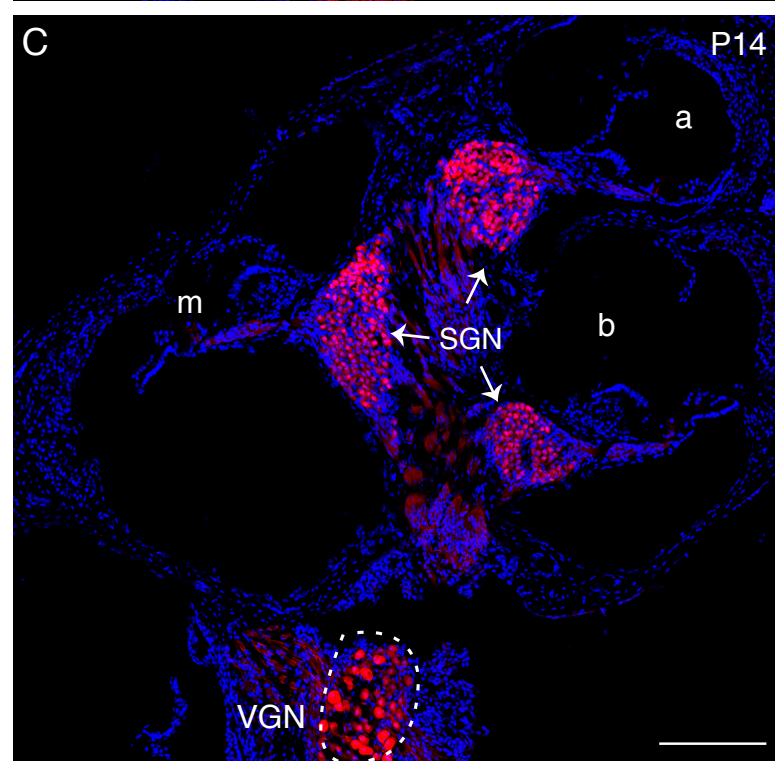

Tdtomato

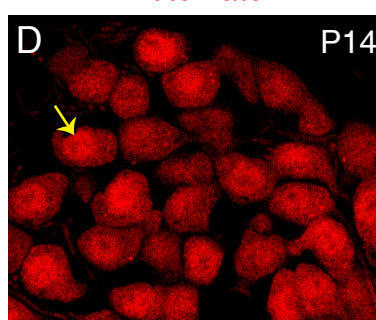

Map2

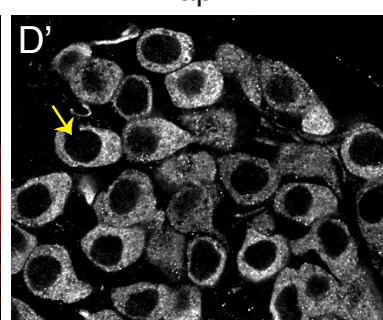

Sox10

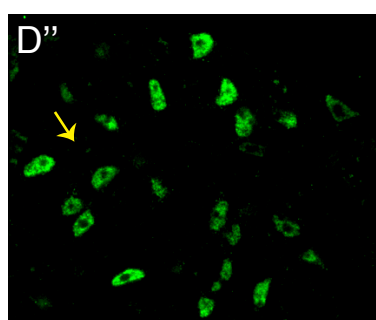

Merge + Hoechst

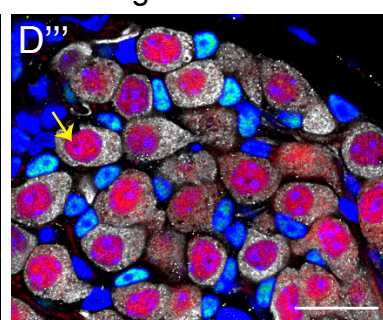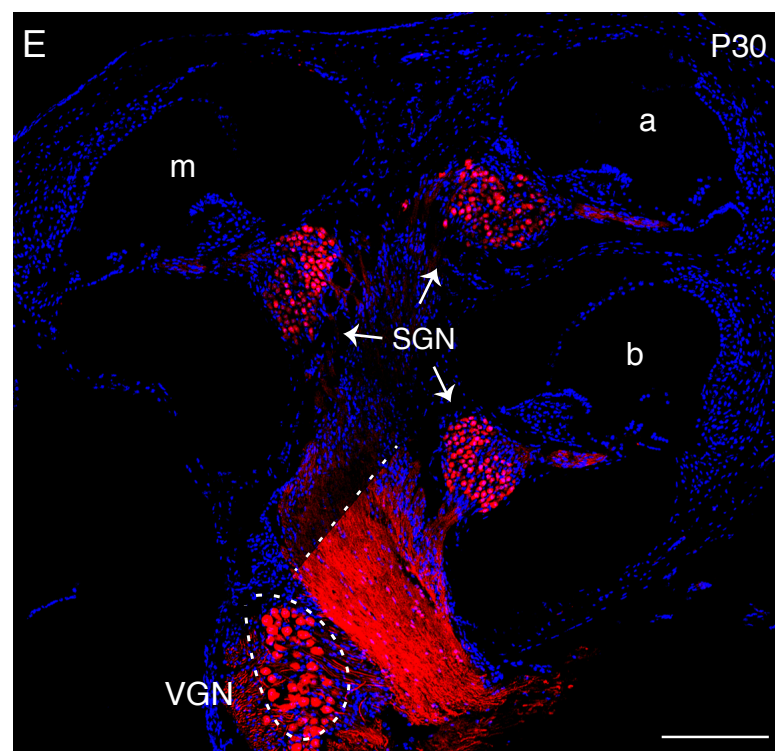

Tdtomato

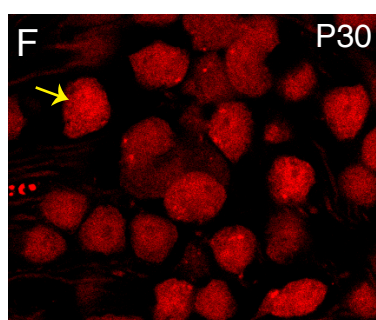

Map2

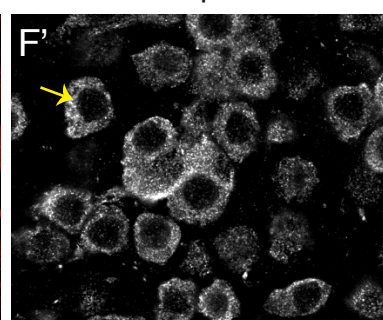

Sox2

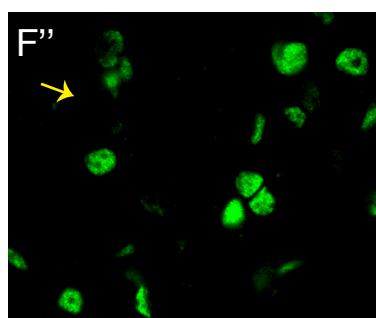

Merge + Hoechst

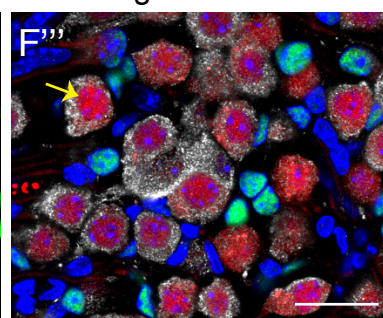

Supplement: supp [file elife-50491-supp-v1.zip]
