# Supplementary material for: Comprehensive transcriptome analysis of cochlear spiral ganglion neurons at multiple ages
Source: eLife journal article supplement (doi:10.7554/elife.50491), 2020-01-08
Supplement: supp [file elife-50491-supp-v1.zip]

Figure 4-figure supplement 1

A

*Scrt2* allele

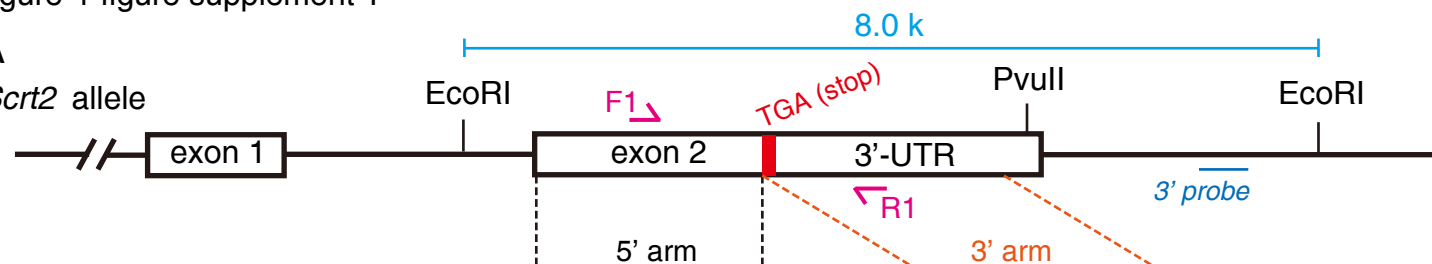

B

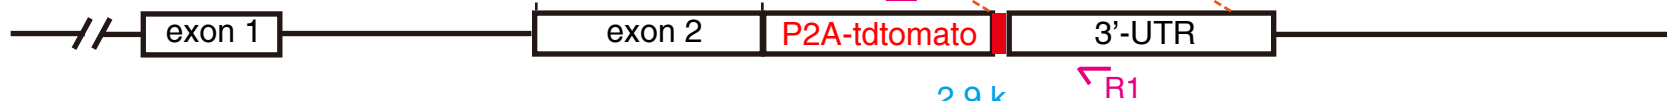

C

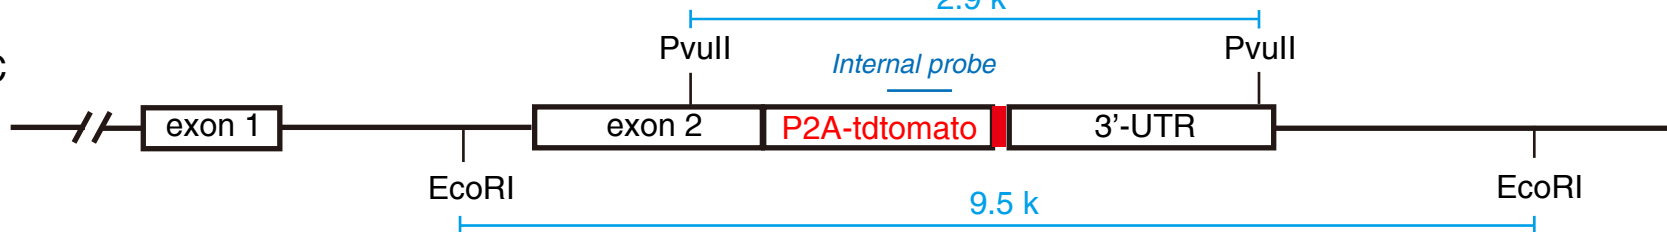

D

3' probe  
(EcoRI)

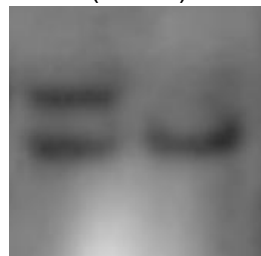

KI/+    +/+

E

Internal probe  
(PvuII)

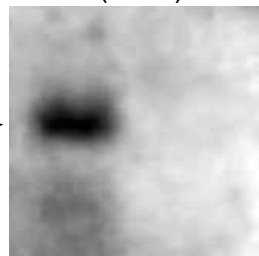

KI/+    +/+

F

Tail DNA PCR

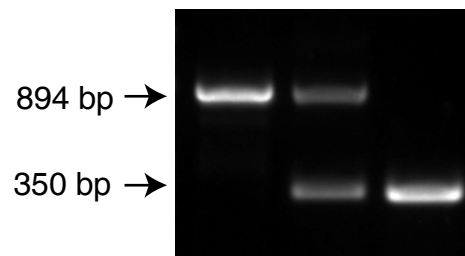

KI/KI    KI/+    +/+
