# Supplementary material for: Comprehensive transcriptome analysis of cochlear spiral ganglion neurons at multiple ages
Source: eLife. 2020 Jan 8;9:e50491. doi: 10.7554/eLife.50491 (PMC7299348; doi:10.7554/eLife.50491)
Supplement: Supplementary file 1. [file elife-50491-supp1.xlsx]

## Sheet: Sheet 1
symbol	pattern in Supplmental Fig. 5B-J
Sept7	----
Txndc17	----
Sec31a	----
Cops4	----
Mis12	----
Derl2	----
Dhx33	----
C1qbp	----
Nup88	----
Rabep1	----
Pfn1	----
Rnf167	----
Slc25a11	----
Med31	----
Mink1	----
Pelp1	----
Dlg4	----
Pkd2	----
BC005561	----
D930016D06Rik	----
Gabarap	----
Ctdnep1	----
Elp5	----
Eif5a	----
Zfp644	----
Gps2	----
Neurl4	----
Psmb6	----
Mybbp1a	----
Hnrnpd	----
Rasgef1b	----
Cenpc1	----
Uba6	----
Ythdc1	----
Taok1	----
Rufy3	----
Git1	----
Mob1b	----
Gm12346	----
Slc4a4	----
Ssh2	----
Blmh	----
Ankrd17	----
Gosr1	----
Vps53	----
G3bp2	----
Ywhae	----
Crk	----
Gm12338	----
Prpf8	----
Wdr81	----
Serpinf1	----
Srr	----
Ncbp3	----
Zzef1	----
Ube2g1	----
Paqr3	----
Spns2	----
Btbd8	----
Nufip2	----
Nlgn2	----
Rpl5	----
Ulk2	----
Tmem11	----
Dhrs7b	----
Flii	----
Svop	----
Drg2	----
Cops3	----
Kctd10	----
Flcn	----
Mmab	----
Mprip	----
Jmjd4	----
Ttc19	----
Git2	----
1500011B03Rik	----
Snap47	----
2210016L21Rik	----
Arf1	----
Rpl37rt	----
Mlec	----
Hist3h2a	----
Rnf187	----
Rnf10	----
Gm12258	----
Zfp672	----
Gatc	----
Ankrd13a	----
Ncor1	----
Sgsm1	----
Ubb	----
Mtf2	----
Dr1	----
Zbtb4	----
Senp3	----
Eif4a1	----
Pcgf3	----
Mpdu1	----
Gak	----
Tmem175	----
Dgkq	----
Fxr2	----
Gm15446	----
Chfr	----
Golga3	----
Ankle2	----
Chd3	----
Trappc1	----
Per1	----
Ulk1	----
Ctc1	----
Pitpnb	----
Miat	----
Pfas	----
Myh10	----
Zfp286	----
Asphd2	----
Zfp287	----
Evi5	----
Adgrl3	----
Polr2b	----
Fam222b	----
Phb	----
Slc35b1	----
Nsg1	----
Ppp1r9b	----
Lrrc59	----
Zfp518b	----
Ankrd40	----
Luc7l3	----
Tob1	----
Rab28	----
Bod1l	----
Spag9	----
Snf8	----
Nme1	----
Dgke	----
Mrps23	----
Cuedc1	----
Vezf1	----
Med28	----
Srsf1	----
Dynll2	----
Supt4a	----
5730480H06Rik	----
Mtmr4	----
Ppm1e	----
Dhx40	----
Cc2d2a	----
Ube2z	----
Cbx1	----
Kpnb1	----
Med24	----
Slbp	----
Psmd3	----
Letm1	----
Nsd2	----
Nelfa	----
Gm1673	----
Ormdl3	----
Mien1	----
Med1	----
Rnf4	----
Fbxl20	----
Stac2	----
Add1	----
Rpl19	----
Htt	----
Rgs12	----
Cacnb1	----
Lrpap1	----
Acox3	----
Rpl23	----
Cwc25	----
Psmb3	----
Srcin1	----
Tbc1d14	----
D5Ertd579e	----
Npepps	----
Ptrh2	----
Dhx15	----
Rps6kb1	----
Med13	----
Kctd8	----
Guf1	----
Zfp207	----
5730455P16Rik	----
Rhot1	----
Suz12	----
Nfxl1	----
Slain2	----
Fryl	----
Ociad1	----
Utp6	----
Rab11fip4	----
Dcun1d4	----
Nlk	----
Ift20	----
Tnfaip1	----
Fip1l1	----
Chic2	----
Poldip2	----
Tmem165	----
Clock	----
Sarm1	----
C530008M17Rik	----
Aasdh	----
Slc46a1	----
Supt6	----
Srp72	----
Psmd11	----
Gemin5	----
Cdk5r1	----
Tmem33	----
Bcas3	----
Appbp2	----
Anapc4	----
Usp32	----
Smim20	----
Rbpj	----
Myo19	----
Tbc1d19	----
Gm43268	----
Stim2	----
Pcdh7	----
Ggnbp2	----
Aatf	----
Acaca	----
Synrg	----
Wdr19	----
Rfc1	----
Rpl9	----
Ddx52	----
Ugdh	----
Smim14	----
Ube2k	----
Pds5a	----
Heatr6	----
Apbb2	----
Uchl1	----
Ap2b1	----
Tmem132e	----
Maea	----
Cnot8	----
Rplp0	----
Zbtb39	----
Fam20c	----
Mars	----
Prkar1b	----
Sun1	----
Get4	----
Dctn2	----
Dtx3	----
Os9	----
Usp15	----
Mon2	----
Tmem5	----
Zfp68	----
Srgap1	----
Tbk1	----
Lemd3	----
Gna12	----
Tmbim4	----
Foxk1	----
Wipi2	----
Grip1	----
Fbxl18	----
Actb	----
Cand1	----
Rnf216	----
Rap1b	----
Xpot	----
Zfp157	----
Naca	----
BC037034	----
Eif4enif1	----
Prkrip1	----
Cux1	----
Ift22	----
Fis1	----
Sarnp	----
Plod3	----
Dnajc14	----
Ap1s1	----
Ache	----
Srrt	----
Rab5b	----
Pa2g4	----
Gnb2	----
Actl6b	----
Rpl41	----
Myl6	----
Smarcc2	----
Mepce	----
Coq10a	----
Zkscan1	----
Cnpy2	----
Pan2	----
Cops6	----
Stat2	----
Baz2a	----
Ptges3	----
E130309D02Rik	----
Srrm3	----
Nup107	----
Mdm2	----
Katnal1	----
Ppfia2	----
Uspl1	----
Cep290	----
Fry	----
Atp2b1	----
N4bp2l2	----
Pds5b	----
Btg1	----
Vps50	----
Nudt4	----
Casd1	----
Lin7a	----
Ndufa12	----
Vezt	----
Lta4h	----
Cdk17	----
Tmpo	----
Anks1b	----
Mios	----
Uhrf1bp1l	----
Actr6	----
Scyl2	----
Utp20	----
Phf14	----
Arl1	----
Ppp1r9a	----
Ppp1r12a	----
Pomp	----
Pan3	----
Frs2	----
Fam220a	----
Cyth3	----
Cct2	----
D130017N08Rik	----
Cnot2	----
Ptprr	----
Ccz1	----
Zfc3h1	----
Lmtk2	----
Tecpr1	----
Thap2	----
Rab21	----
Smurf1	----
Arpc1a	----
Atxn7l3b	----
Pdap1	----
Ptcd1	----
Atp5j2	----
Zkscan5	----
Zfp655	----
Krr1	----
Cdk8	----
Wasf3	----
Usp12	----
Polr1d	----
Zdhhc17	----
Slc35e3	----
Limk2	----
Por	----
Rhbdd2	----
Atxn2	----
Sh2b3	----
Cux2	----
Ppp1cc	----
Rnf130	----
Zfp62	----
Vps29	----
Rack1	----
Clint1	----
Tenm2	----
Rars	----
Npm1	----
Brap	----
Fbxw11	----
Camkk2	----
Rnf34	----
Bod1	----
Psme4	----
Bcl7a	----
Rps27a	----
Diablo	----
Vps33a	----
Clip1	----
Ppp4r3b	----
Pex13	----
0610010F05Rik	----
Ubtd2	----
Tbc1d9b	----
Erp29	----
Naa25	----
Gcn1l1	----
Rab35	----
G3bp1	----
Tnip1	----
Cdc42se2	----
Fnip1	----
Rad50	----
Suds3	----
Sept8	----
Aff4	----
9530068E07Rik	----
Skp1a	----
Ppp2ca	----
Fbxo21	----
Cdkl3	----
Ube2b	----
Sec24a	----
0610009B22Rik	----
Med13l	----
Rmnd5b	----
Clk4	----
Zfp354c	----
Sqstm1	----
Ptpn11	----
Rpl6	----
Hectd4	----
Trafd1	----
Hip1r	----
Ahsa2	----
Ogfod2	----
Usp34	----
Zmiz2	----
Tmed4	----
Gm15920	----
Tmem248	----
Sbds	----
Ddx56	----
Nudcd3	----
Ykt6	----
Mrps24	----
Xbp1	----
Thoc5	----
Gatsl2	----
Gtf2ird2	----
Gtf2i	----
Nipsnap1	----
Gtf2ird1	----
Clip2	----
Eif4h	----
Ascc2	----
Abhd11	----
Mtmr3	----
Sf3a1	----
Morc2a	----
Tug1	----
Baz1b	----
Pom121	----
Rnf185	----
Ccm2	----
Larp1	----
Asl	----
Vkorc1l1	----
Pitpnm2	----
Mphosph9	----
Cct4	----
Commd1	----
Sbno1	----
Kmt5a	----
Rilpl1	----
Tmed2	----
Ddx55	----
Eif2b1	----
Atp6v0a2	----
Ugp2	----
Zfp664	----
Ncor2	----
Lgalsl	----
Aftph	----
Cep68	----
Actr2	----
C1d	----
Ran	----
Rps16-ps2	----
Sfswap	----
Mrps17	----
Cnrip1	----
Cct6a	----
Sec61g	----
Zbed5	----
Nacad	----
Gnptab	----
Ctbp1	----
Casc3	----
Cap1	----
Sel1l	----
Pabpc4	----
Macf1	----
Ndufs5	----
Akirin1	----
Rragc	----
Gtf2a1	----
Snw1	----
Sptlc2	----
Vipas39	----
Tmed8	----
Spata7	----
Gstz1	----
Tmem63c	----
Cipc	----
Tmed10	----
Thrap3	----
Nek9	----
Trappc3	----
Acyp1	----
Ago1	----
Ylpm1	----
Psmb2	----
Arel1	----
AU040320	----
Gnl2	----
Zc3h14	----
Rlf	----
Zmpste24	----
Dmap1	----
Papola	----
Atp6v0b	----
Ipo13	----
Atg2b	----
Kdm4a	----
Dicer1	----
Otub2	----
Szt2	----
Med8	----
Unc79	----
Ebna1bp2	----
Btbd7	----
Ubr7	----
Itpk1	----
Lgmn	----
Cpsf2	----
Trip11	----
Foxj3	----
Ppp4r3a	----
Scmh1	----
Ttc7b	----
Psmc1	----
Ttc8	----
Rims3	----
Smap2	----
Eml5	----
Zmym4	----
Eri3	----
Npc2	----
Zmym6	----
Zbtb1	----
Ppp2r5e	----
Snapc1	----
Hif1a	----
Slc38a6	----
A930004J17Rik	----
Six1	----
Gmeb1	----
Phactr4	----
Atpif1	----
Ppm1a	----
Eya3	----
Zcchc17	----
Pcnx4	----
Stx12	----
Rtn1	----
Ahdc1	----
Jkamp	----
Arid4a	----
Psma3	----
Tmem222	----
Wdtc1	----
Actr10	----
Tmx1	----
Nudc	----
Zdhhc18	----
Ppp1r8	----
Max	----
Fut8	----
Gphn	----
Zfp410	----
Dnal1	----
Csmd2	----
Numb	----
Psen1	----
Trim62	----
Rgs6	----
Ak2	----
Sipa1l1	----
Pcnx	----
AC125351.1	----
Srsf5	----
Yars	----
Slc39a9	----
Galnt16	----
Zbtb8os	----
Exd2	----
Actn1	----
Hdac1	----
Eif3i	----
Tmem234	----
Rdh11	----
Txlna	----
Kpna6	----
Vti1b	----
Ptp4a2	----
Eif2s1	----
Fam161b	----
Rnf220	----
Rps8	----
Vrk1	----
Snapc3	----
Psip1	----
Ccdc171	----
Zkscan8	----
AK157302	----
Zkscan3	----
Rraga	----
Trim27	----
Rps6	----
Elmo1	----
Stard3nl	----
Vps41	----
Zdhhc21	----
Yae1d1	----
Mtap	----
Elavl2	----
Plaa	----
Rala	----
Mysm1	----
Cdk13	----
Hook1	----
Psma2	----
Hecw1	----
Patj	----
Arid4b	----
Usp1	----
Klhl9	----
Hist1h1e	----
Mpdz	----
Hist1h1c	----
Nup153	----
Fam8a1	----
Atxn1	----
Jarid2	----
Ranbp9	----
Nol7	----
Tmem14c	----
Zfp37	----
Fkbp15	----
Slc35b3	----
Cdc26	----
Txndc5	----
Snrnp48	----
Riok1	----
Ssr1	----
Lyrm4	----
Prpf4b	----
Wrnip1	----
Exoc2	----
Dusp22	----
Uqcrfs1	----
Trim32	----
Cdkal1	----
Mrs2	----
Tdp2	----
BC005537	----
Frmd3	----
Tbce	----
B3galnt2	----
Lyst	----
Tollip	----
2010107E04Rik	----
Bag5	----
Mark3	----
Faf1	----
Elavl4	----
Eif5	----
Cdc42bpb	----
Rcor1	----
Cmpk1	----
Tecpr2	----
Efcab14	----
Wdr20	----
Ppp2r5c	----
Wars	----
Yy1	----
Lrrc41	----
Pomgnt1	----
Pik3r3	----
Evl	----
Gpbp1l1	----
Ccdc85c	----
Ccnk	----
Prdx1	----
Mmachc	----
Zswim5	----
Setd3	----
Hectd3	----
Eps15	----
Sos2	----
Osbpl9	----
Akt1	----
Gpr137b-ps	----
Ero1lb	----
Mtr	----
Dip2c	----
Larp4b	----
Slc35d1	----
Gm12715	----
Gtpbp4	----
Wdr37	----
Usp24	----
Pitrm1	----
Ttc4	----
Fam208b	----
Mrpl37	----
Gdi2	----
Tmem59	----
Rapgef5	----
Magoh	----
0610037L13Rik	----
Zfp386	----
Pacs2	----
Brf1	----
Prpf38a	----
Cc2d1b	----
Zfyve9	----
Btf3l4	----
Cep170b	----
Nrd1	----
Msl1	----
Nemf	----
Rps29	----
Rundc3b	----
Sumo2	----
Dmtf1	----
Mrpl58	----
Rpl38	----
Amz2	----
Gna13	----
Cacng5	----
Helz	----
Psmd12	----
Nol11	----
Bptf	----
Adam22	----
Phtf2	----
Cep95	----
Ddx5	----
Psmc5	----
Ftsj3	----
Ddx42	----
Pmpcb	----
Ccdc47	----
Psmc2	----
Orc5	----
Dcaf7	----
Kmt2e	----
Srpk2	----
Kpna2	----
Nup85	----
Gga3	----
Grb2	----
Eif4a3	----
Rbfox3	----
Cant1	----
Mrpl20	----
Usp36	----
Cyth1	----
Dvl1	----
Pgs1	----
Srsf2	----
Acap3	----
Ube2j2	----
Rnf157	----
Exoc7	----
Plekhn1	----
Noc2l	----
Gm15772	----
Fam133b	----
Srp68	----
Acox1	----
Ankib1	----
Krit1	----
Akap9	----
Fbf1	----
Unk	----
Cdk14	----
Sap30bp	----
Recql5	----
Tlk2	----
Rptor	----
Cdc27	----
Klhl7	----
Ezh1	----
Mapre3	----
Tmem214	----
Tubg1	----
Ost4	----
Preb	----
Retreg3	----
Atraid	----
Kat2a	----
Dnajc7	----
Gtf3c2	----
Acly	----
Coa3	----
Nt5c3b	----
Nrbp1	----
Ift172	----
Fndc4	----
Zfp512	----
Gpn1	----
Supt7l	----
Slc4a1ap	----
Babam2	----
Wipf2	----
Ppp1cb	----
Yes1	----
Prr14l	----
Eif1	----
Becn1	----
Selenoi	----
Rpl27	----
Kansl1	----
Fmnl1	----
Hexim1	----
Nmt1	----
Dcakd	----
Eftud2	----
Agap3	----
Abcf2	----
Ccdc43	----
Gpatch8	----
Slc25a39	----
Rundc3a	----
Prkag2	----
Galnt11	----
Ubtf	----
G6pc3	----
Dpp6	----
Paxip1	----
Lsm12	----
Rbm33	----
Rnf32	----
Dhx8	----
Nom1	----
Ube3c	----
Dnajb6	----
Nbr1	----
Hadha	----
Fam126a	----
Aatk	----
Slc35e2	----
Nadk	----
Cdc42	----
Heatr5a	----
Usp48	----
Hectd1	----
Strn3	----
Scfd1	----
Hp1bp3	----
Pnpla8	----
Dnajb9	----
Tspan13	----
Camk2n1	----
Minos1	----
Snx6	----
Mrto4	----
Ubr4	----
Arhgef10l	----
Hbp1	----
Cbll1	----
Acp1	----
Atp13a2	----
Myt1l	----
Trappc12	----
Fbxo42	----
Zbtb17	----
Rps7	----
Cmpk2	----
Emc1	----
Srp54a	----
Fam177a	----
Kdm1a	----
Cep85	----
Pdik1l	----
Fancm	----
Fkbp3	----
Prpf39	----
Togaram1	----
Klhl28	----
Tmem57	----
Tmem50a	----
Rsrp1	----
Lrfn5	----
Pnn	----
Sec23a	----
Rcan3	----
Mbip	----
Srsf10	----
Brms1l	----
Ralgapa1	----
Psma6	----
Ppp2r3c	----
Eloa	----
Rpl11	----
Srp54b	----
Zfp46	----
Hnrnpr	----
1700047I17Rik2	----
Srp54a	----
Ddi2	----
Dnajc16	----
Casp9	----
Prdm2	----
Dtnb	----
Asxl2	----
Rab10	----
Rab10os	----
Tbcd	----
Narf	----
Csnk1d	----
Rfng	----
Lrrc45	----
Mafg	----
Sirt7	----
Pcyt2	----
Anapc11	----
Arhgdia	----
Mcrip1	----
Cep104	----
Hgs	----
Arl16	----
Tprgl	----
Nploc4	----
Pank4	----
Actg1	----
Slc38a10	----
Ski	----
Faap20	----
Prkcz	----
Gnb1	----
Efr3b	----
Klhdc2	----
H6pd	----
Sf3b6	----
Ywhaq	----
Vps13d	----
Cpsf3	----
Asap2	----
Hpcal1	----
Clcn6	----
Pdia6	----
Rock2	----
E2f6	----
Lpin1	----
Trib2	----
Nbas	----
Ddx1	----
Gm4294	----
Mtor	----
Smc6	----
Srm	----
Tardbp	----
Laptm4a	----
Pum2	----
Ldah	----
Atad2b	----
Ube4b	----
Lzic	----
Ctnnbip1	----
Fkbp1b	----
Pik3cd	----
Itsn2	----
Nt5dc3	----
Gpr85	----
Hsp90b1	----
Mthfsd	----
Emc8	----
Zdhhc7	----
Usp10	----
Mbtps1	----
Hsbp1	----
Gan	----
Herc2	----
Atmin	----
Gabrb3	----
Maf	----
Mon1b	----
Map1lc3b	----
Ube3a	----
Gm38393	----
Tmem231	----
Cfdp1	----
Bcar1	----
Ndn	----
Zfp1	----
Znrf1	----
Wdr59	----
Rfwd3	----
Pdpr	----
Apba2	----
Clec18a	----
Cntnap4	----
Prmt3	----
Jph3	----
Zdhhc13	----
Ruvbl2	----
Exoc8	----
Gnpat	----
2810004N23Rik	----
Ttc13	----
Nup133	----
Gas8	----
Car11	----
Sphk2	----
Afg3l1	----
Def8	----
Cyth2	----
Tubb3	----
Spire2	----
Nomo1	----
Kcnj11	----
Vps9d1	----
Cdk10	----
2810013P06Rik	----
Ankrd11	----
Hps5	----
Gtf2h1	----
Acsf3	----
Tsg101	----
Zc3h18	----
Spty2d1	----
Banp	----
Nsmce3	----
Tsnax	----
Ddx19b	----
St3gal2	----
Vps33b	----
Ctcf	----
Unc45a	----
Man2a2	----
Furin	----
Crtc3	----
Ripor1	----
Atp6v0d1	----
D230025D16Rik	----
Zfp592	----
Rps17	----
Dync1li2	----
Ngrn	----
Cmtm4	----
Csnk2a2	----
Cfap20	----
Zfp319	----
Katnb1	----
Hdgfl3	----
Arl2bp	----
Rspry1	----
Fam192a	----
Nup93	----
Gm7964	----
Bbs2	----
Nudt21	----
Slc38a7	----
Acd	----
Gfod2	----
Ranbp10	----
Cog4	----
Sf3b3	----
Vac14	----
Ap1g1	----
Atxn1l	----
Lysmd4	----
Ist1	----
Dhx38	----
Psmd7	----
Wwp2	----
Nfat5	----
Rgma	----
Cyb5b	----
Chd2	----
Terf2	----
Cog8	----
Utp4	----
Slco3a1	----
Chtf8	----
Slc7a6os	----
Ntrk3	----
Slc7a6	----
Aen	----
Abhd2	----
Polg	----
Nfatc3	----
Edc4	----
Tarsl2	----
Ppfia3	----
Tomm20	----
Trpm4	----
Sc5d	----
Clmp	----
Msantd2	----
Pknox2	----
Eif3k	----
Fez1	----
Ei24	----
Psmd8	----
Yif1b	----
Stt3a	----
Fam118b	----
Arhgap32	----
Arhgef12	----
Zbtb44	----
Zfp27	----
Ncapd3	----
Vps26b	----
Zfp260	----
Thyn1	----
Herpud2	----
Bbs9	----
Clip3	----
Prkcsh	----
Syne4	----
Lrfn3	----
Carm1	----
Ntm	----
Nectin1	----
Samd4b	----
Cbl	----
Sik3	----
Pafah1b2	----
Ccdc97	----
Hnrnpul1	----
Sidt2	----
Egln2	----
Snrpa	----
BC024978	----
Pcsk7	----
Rnf214	----
AC126804.2	----
Bace1	----
Ube4a	----
Atp5l	----
Akt2	----
Ift46	----
Map3k10	----
Zfp60	----
Arcn1	----
Psmc4	----
Ddx6	----
Rps25	----
Trappc4	----
Hyou1	----
Supt5	----
Rps16	----
C2cd2l	----
Dnm2	----
Psenen	----
Cdkn2d	----
Cox6b1	----
Zfp719	----
Panx1	----
Mre11a	----
Amotl1	----
Cwc15	----
Josd2	----
Cep57	----
Mtmr2	----
Arhgap42	----
Birc2	----
Nup62	----
Tbc1d17	----
Dync2h1	----
Ptov1	----
Med25	----
Ap2a1	----
Cpt1c	----
Prmt1	----
Irf3	----
Scaf1	----
Prr12	----
Gria4	----
Msantd4	----
Rpl13a	----
Gucy1a2	----
Cwf19l2	----
Pard3	----
Iglon5	----
Amfr	----
Vstm5	----
Zfp788	----
Tmem147	----
Usf2	----
Keap1	----
Pde4a	----
Mrpl4	----
Uba2	----
Gpi1	----
4931406P16Rik	----
Eif3g	----
Kctd15	----
Chst8	----
Ppan	----
Cebpg	----
Lrp3	----
Olfm2	----
Ubl5	----
Zfp846	----
Pdcd5	----
Zfp426	----
Gm45768	----
Zfp536	----
Zfp317	----
1600014C10Rik	----
Pop4	----
Chordc1	----
Gm26526	----
Cep295	----
Taf1d	----
Zpr1	----
Gnao1	----
Aktip	----
Wrn	----
Nrg1	----
Cd2bp2	----
Tbc1d10b	----
Tti2	----
Unc5d	----
Prosc	----
Hook3	----
Fbrs	----
Phkg2	----
Rnf40	----
Pomk	----
Sez6l2	----
Ash2l	----
Letm2	----
Tm2d2	----
Golga7	----
Gins4	----
Bckdk	----
Gpat4	----
Ikbkb	----
Gm9299	----
Vdac3	----
Vps36	----
BC017158	----
Alg11	----
Bag4	----
Ppp2cb	----
Ubxn8	----
Ino80e	----
Cdr2	----
Hpf1	----
Usp31	----
Trappc11	----
Acsl1	----
Ndufab1	----
Dctn5	----
Asah1	----
Rbbp6	----
Tnrc6a	----
Mtus1	----
Lcmt1	----
Mtmr7	----
Gtf3c1	----
Tusc3	----
Xpo6	----
Spns1	----
Sh2b1	----
Tufm	----
Tnks	----
Eif3c	----
Sgf29	----
Saraf	----
Leprotl1	----
Ypel3	----
Ppp4c	----
Dctn6	----
Tial1	----
Clcn3	----
Gm21092	----
Mcmbp	----
Elavl1	----
Tubgcp2	----
Timm44	----
Snapc2	----
Fuom	----
Echs1	----
Map2k7	----
Evi5l	----
Stxbp2	----
Xab2	----
Pnpla6	----
Mcoln1	----
Lig4	----
Insr	----
Ptdss2	----
Osbpl5	----
Cars	----
Phrf1	----
Nap1l4	----
Taldo1	----
Kcnq1ot1	----
Cd81	----
Mrpl23	----
Dusp8	----
Mob2	----
Brsk2	----
Ppfia1	----
Abhd13	----
Irs2	----
Ing1	----
6820431F20Rik	----
Wdr11	----
Ate1	----
Gm21811	----
Plekha1	----
Rpl19-ps11	----
2310057M21Rik	----
Agpat5	----
Acadsb	----
Bub3	----
Cln8	----
Fbxo25	----
Fam53b	----
Abraxas2	----
Zranb1	----
Ctbp2	----
Edrf1	----
Champ1	----
Cdc16	----
Tfdp1	----
Tmco3	----
Dcun1d2	----
Cul4a	----
Glrx3	----
Arhgef7	----
Ppp2r2d	----
Ankrd10	----
2610005L07Rik	----
Eef2k	----
Nek1	----
Gm45516	----
Thap12	----
Asna1	----
Map6	----
Prdx2	----
Mast1	----
Rps3	----
Arrb1	----
Calr	----
Cacna1a	----
Spcs2	----
Rfx1	----
Pold3	----
Emsy	----
Gipc1	----
C2cd3	----
Elmod2	----
Tbc1d9	----
Rnf150	----
Smarca5	----
Anapc10	----
Abce1	----
Fchsd2	----
Otud4	----
Smad1	----
Clpb	----
Rbmxl1	----
Ppme1	----
Tnpo2	----
Wdr83	----
Wdr83os	----
Zfand6	----
Rbl2	----
Chd9	----
Hikeshi	----
Picalm	----
Brd7	----
Heatr3	----
Crebzf	----
Tmem126a	----
N4bp1	----
Siah1a	----
Lonp2	----
Ccdc90b	----
Ankrd42	----
Phkb	----
4632427E13Rik	----
Dnaja2	----
Vps35	----
Nars2	----
Gab2	----
Man2b1	----
Ndufc2	----
Ints4	----
Rsf1	----
Clns1a	----
Aqp11	----
Pak1	----
Tmem184c	----
Numa1	----
Prmt9	----
Rnf121	----
Lsm4	----
Parva	----
Upf1	----
Far1	----
Copb1	----
Psma1	----
Cope	----
Sugp2	----
Plekha7	----
Rps13	----
Pik3c2a	----
Tmem161a	----
Gm4366	----
Rps15a	----
Sugp1	----
Smg1	----
Mau2	----
Gatad2a	----
Atp13a1	----
Ccp110	----
9030624J02Rik	----
Knop1	----
Zfp866	----
Zfp868	----
Gm5601	----
Gm10033	----
Lzts1	----
Usp47	----
Fto	----
Ctr9	----
Rpl18a	----
Large1	----
Nup98	----
Sin3b	----
Stim1	----
Rrm1	----
Fam160a2	----
Smim7	----
Slc35e1	----
Trim3	----
Cherp	----
Eps15l1	----
Ap1m1	----
Fam32a	----
Mrpl17	----
Zfp617	----
Tub	----
Ric3	----
Unc13a	----
Rpl27a	----
Tmem9b	----
Colgalt1	----
Dennd5a	----
Ano8	----
Ipo7	----
Dda1	----
Mrpl34	----
Map1s	----
Mast3	----
Rbm7	----
Cic	----
Usp28	----
Dctn1	----
Fig4	----
Wasf1	----
Cdc40	----
Stambp	----
Cdk19	----
Amd1	----
Paip2b	----
Zfp638	----
Gtf3c6	----
Rpf2	----
Exoc6b	----
Wbp1	----
Fyn	----
Tspyl1	----
Cct7	----
Rwdd1	----
Alms1	----
Ptges3-ps	----
Zufsp	----
Rnf146	----
9330159F19Rik	----
Snrpg	----
Pcyox1	----
Soga3	----
Pcbp1	----
Hdac2	----
Sec63	----
1700021F05Rik	----
Cd24a	----
Ranbp2	----
Gcc2	----
Chmp3	----
Kdm3a	----
Serinc1	----
Mrpl35	----
Immt	----
Ptcd3	----
Polr1a	----
Hsf2	----
Usp39	----
0610030E20Rik	----
Rnf181	----
Asf1a	----
Mat2a	----
Mcm9	----
Cep85l	----
Slc35f1	----
Gopc	----
Dcbld1	----
Ascc3	----
Grik2	----
Lin28b	----
Bves	----
Prep	----
Pole4	----
Sema4f	----
Med23	----
Gm10273	----
Stx7	----
Eya4	----
Lats1	----
Lrp11	----
Mtrf1l	----
Rmnd1	----
Zbtb2	----
Ppp2r3d	----
Tpt1-ps3	----
Rybp	----
Ppp4r2	----
Lztfl1	----
Gm10052	----
Exosc7	----
Uba3	----
Zdhhc3	----
Zfp445	----
9530059O14Rik	----
Bhlhe40	----
Arl8b	----
Edem1	----
Zfp651	----
Ss18l2	----
Rad18	----
Srgap3	----
Thumpd3	----
Gt(ROSA)26Sor	----
Setd5	----
Crbn	----
Tmf1	----
Magi1	----
Prickle2	----
Nfu1	----
Gfpt1	----
Tbpl1	----
Isy1	----
Cnbp	----
Copg1	----
Hbs1l	----
Rpn1	----
Ahi1	----
Ruvbl1	----
Bclaf1	----
Abtb1	----
Podxl2	----
Vta1	----
Hivep2	----
Pex3	----
Nup210	----
Fuca2	----
Phactr2	----
Fbxo30	----
Shprh	----
Stxbp5	----
Slc6a6	----
Ccdc174	----
Samd5	----
Nr2c2	----
Rbsn	----
Gmcl1	----
Eif2ak3	----
Ddit4	----
Smarcad1	----
Ap3d1	----
Mkln1	----
Btbd2	----
Csnk1g2	----
Exoc4	----
Rexo1	----
Mbd3	----
Rps15	----
Cnot4	----
Nup205	----
1810058I24Rik	----
Mtpn	----
Klhdc10	----
Dgki	----
Wdr18	----
R3hdm4	----
Med16	----
Ubn2	----
Polrmt	----
Cdc34	----
Tpgs1	----
2610008E11Rik	----
Ilvbl	----
Rrp1	----
Mkrn1	----
Pfkl	----
Tmem259	----
Lsm7	----
Ube2h	----
Nrf1	----
Fbxo7	----
Capza2	----
Rtcb	----
Tmem263	----
Ckap4	----
Gm26809	----
Appl2	----
Washc4	----
Tdg	----
Ankrd24	----
Gna11	----
Ncln	----
Pot1a	----
Pip5k1c	----
Atcay	----
Zfp800	----
Pias4	----
Snd1	----
Map2k2	----
Rbm28	----
Impdh1	----
Calu	----
Thop1	----
Atp6v1f	----
Slc39a3	----
Tnpo3	----
Timm13	----
Ndufb2	----
Braf	----
Mrps33	----
Tmem178b	----
Cbx3	----
Snx10	----
Hibadh	----
Ube2d1	----
Tfam	----
Ccdc6	----
Rhobtb1	----
Lrrtm3	----
Plekha8	----
Mturn	----
Znrf2	----
Sirt1	----
Herc4	----
Rufy2	----
Avl9	----
Slc25a16	----
Ccar1	----
Nt5c3	----
Ddx50	----
Lancl2	----
Vps26a	----
Supv3l1	----
Lrrc20	----
Sgpl1	----
Slc29a3	----
Anapc16	----
Ccser1	----
Hnrnpa2b1	----
Sec22c	----
Cisd1	----
Dfna5	----
Agk	----
E330009J07Rik	----
Ssbp1	----
Sumo3	----
Casp2	----
Fam131b	----
Pofut2	----
Tcaf1	----
Pcbp3	----
Cul1	----
Lss	----
Mcm3ap	----
Zfp398	----
Pcnt	----
Zfp746	----
Krba1	----
Dip2a	----
Zfp862-ps	----
Repin1	----
Zfp280b	----
Smarcb1	----
Lrrc75b	----
Malsu1	----
Igf2bp3	----
Tra2a	----
Snrpd3	----
Specc1l	----
Gnaz	----
Ctnnb1	----
Rpl14	----
Eif1b	----
Bnip2	----
Ice2	----
Vps13c	----
Rpl28	----
Usp3	----
Fam96a	----
Csnk1g1	----
Fiz1	----
Trip4	----
Spg21	----
Clpx	----
Epn1	----
Ppp6r1	----
Zfp444	----
Hacd3	----
Peg3	----
Dennd4a	----
Clcn4	----
Zfp606	----
Rab11a	----
Zfp329	----
Megf11	----
Dis3l	----
Zfp324	----
Zfp446	----
Rpl4	----
Igdcc4	----
Gtf2a2	----
Rnf111	----
Mindy2	----
Dopey1	----
Ibtk	----
Phip	----
Senp6	----
Klhl42	----
Cox7a2	----
Mto1	----
Ergic2	----
Rn7sk	----
Scg3	----
Caprin2	----
Tmod2	----
Dennd5b	----
Tmod3	----
Mapk6	----
Bicd1	----
Fam214a	----
Rsl24d1	----
Pigb	----
Pygo1	----
Nedd4	----
Rfx7	----
Zfp280d	----
Rpl15-ps2	----
Tcf12	----
Polr2m	----
Leng8	----
Fem1b	----
Rplp1	----
Ube2m	----
Myo9a	----
Ube2q2	----
Clasrp	----
Psma4	----
Ireb2	----
Wdr61	----
Dmxl2	----
Rps6-ps3	----
Gm10175	----
Cul5	----
Zfp235	----
Npat	----
Atm	----
Zfp61	----
Ddx10	----
Zc3h12c	----
Cadm4	----
Irgq	----
Xrcc1	----
Sik2	----
Ppp2r1b	----
1110032A03Rik	----
Timm8b	----
Pts	----
Rpl10-ps3	----
Zfp574	----
Dedd2	----
Gsk3a	----
Mark4	----
Cyb5r4	----
Scaper	----
Rcn2	----
Senp8	----
Parp6	----
Selenow	----
Nop53	----
Arih1	----
Bbs4	----
Adpgk	----
Hcn4	----
Stoml1	----
Sae1	----
Ubl7	----
Arhgap35	----
Clk3	----
Fkrp	----
Strn4	----
Csk	----
Mpi	----
Sin3a	----
Snupn	----
Lingo1	----
Nova2	----
Hmg20a	----
Sympk	----
Peak1	----
Snrpd2	----
Tspan3	----
Opa3	----
Rtn2	----
Id4	----
Cep162	----
Bhlhe41	----
Tma7	----
Cacna1c	----
Dcp1b	----
Ip6k2	----
Prkar2a	----
Arih2	----
Dalrd3	----
Impdh2	----
Wnk1	----
Qrich1	----
Qars	----
Usp19	----
Cdc25a	----
Bcl2l13	----
Pex26	----
Gpx1	----
Rhoa	----
Tcta	----
Nicn1	----
Apeh	----
Rbm5	----
Pex5	----
Hemk1	----
Dock3	----
Emg1	----
Phb2	----
Usp4	----
Bms1	----
Dhx30	----
Hnrnpf	----
Slc25a38	----
Wdr48	----
Oxsr1	----
Golga4	----
Rbms3	----
Creld1	----
Stt3b	----
Emc3	----
Brk1	----
Vhl	----
Rps27rt	----
Sec13	----
Dync1li1	----
Atg7	----
Cnot10	----
Mkrn2	----
Raf1	----
Ubp1	----
Rpl32	----
Clasp2	----
Mlh1	----
Tmcc1	----
Lrrfip2	----
Klhl18	----
Zfp422	----
Ptpn23	----
Scap	----
Atn1	----
Rbm15b	----
Manf	----
Usp5	----
Cep70	----
Dusp16	----
Faim	----
Copb2	----
Clstn2	----
Fam234b	----
Rpl36a-ps3	----
Atf7ip	----
H2afj	----
Wbp11	----
Slc25a36	----
Strap	----
Rasa2	----
Tfdp2	----
Aebp2	----
Rpl38-ps2	----
Golt1b	----
Atr	----
Cmas	----
St8sia1	----
Pls1	----
Trpc1	----
U2surp	----
Tbc1d2b	----
Kras	----
Morf4l1	----
Snx14	----
Mras	----
Ints13	----
Armc8	----
Smim10l1	----
Vprbp	----
Ptms	----
Mlf2	----
Rad54l2	----
Pcbp4	----
Zfp384	----
Chd4	----
Nop2	----
Abhd14b	----
Twf2	----
Mrpl51	----
Pik3r4	----
Atp2c1	----
Mrpl3	----
D6Wsu163e	----
Dnajc13	----
Tigar	----
Parp11	----
Uba5	----
Cdv3	----
Srprb	----
Anapc13	----
Itfg2	----
Cep63	----
Ppp2r3a	----
Stag1	----
Nck1	----
Etv6	----
Ptpdc1	----
Jak1	----
Wnk2	----
Srbd1	----
Odf2	----
Gle1	----
Mta3	----
Cox7a2l	----
Set	----
Zer1	----
Tbc1d13	----
Lrrc8a	----
Eml4	----
Map4k3	----
Srsf7	----
Slc27a4	----
Miga2	----
Ptpa	----
Ntmt1	----
Hnrnpll	----
Atl2	----
Cebpz	----
Gpatch11	----
BC005624	----
Usp20	----
Fnbp1	----
Heatr5b	----
Ttc27	----
Birc6	----
Crat	----
Rapgef1	----
Med27	----
6530402F18Rik	----
Inpp5e	----
Sec16a	----
Usp14	----
Fam69b	----
Thoc1	----
Med22	----
Rpl7a	----
[truncated: 7,350 more rows]
