# Supplementary material for: Comprehensive transcriptome analysis of cochlear spiral ganglion neurons at multiple ages
Source: eLife. 2020 Jan 8;9:e50491. doi: 10.7554/eLife.50491 (PMC7299348; doi:10.7554/eLife.50491)
Supplement: Supplementary file 2. [file elife-50491-supp2.xlsx]

## Sheet: Sheet1
Mouse strain	Primer name	Primer Sequence (5'-3')	PCR size (F1+R1)	PCR size (F2+R1)
Scrt2-P2A-Tdtomato/+	Scrt2-F1	GCACATGCAGACGCACTC	350bp
	Scrt2-R1	GAGTGGTGGCCAGAATGGAC		894 bp
	Scrt2-F2	ACATGGCCGTCATCAAAGA
Celf4-iCreER/+	Celf4-F1	TTCGTGAGCTTCGACAACC	471 bp
	Celf4-R1	CCTAGGGTCCCTGGCTAACT		612 bp
	Celf4-F2	TATATCATGGCCGACAAGCA
qPCR primers			amplicon size
	Mafb-Forward	TCCACCTCTTGCTACGTGTG	93 bp
	Mafb-Reverse	CGTTAGTTGCCAATGTGTGG
	Sox10-Forward	CGAGCAAGGAGGGGCT	120 bp
	Sox10-Reverse	CTCTGGCCTGAGGGGTG
	Myosin-VI-forward	GAGAGGCGGATGAAACTTGAGA	251 bp
	Myosin-VI-Reverse	CTTCGGAGTGCCATGTCACC
	Gapdh-Forward	TGTGTCCGTCGTGGATCTGA	150 bp
	Gapdh-Reverse	TTGCTGTTGAAGTCGCAGGAG
	Celf4-Forward	GCCCCCTTCACATAGAAAACTC	269 bp
	Celf4-Reverse	TGCGCTCCTTGTCAGTGTC
