# Supplementary figures and images for: Comprehensive transcriptome analysis of cochlear spiral ganglion neurons at multiple ages
Source: eLife journal article supplement (doi:10.7554/elife.50491), 2020-01-08

Figure 2-figure supplement 2

# Markers for post-sequencing QC

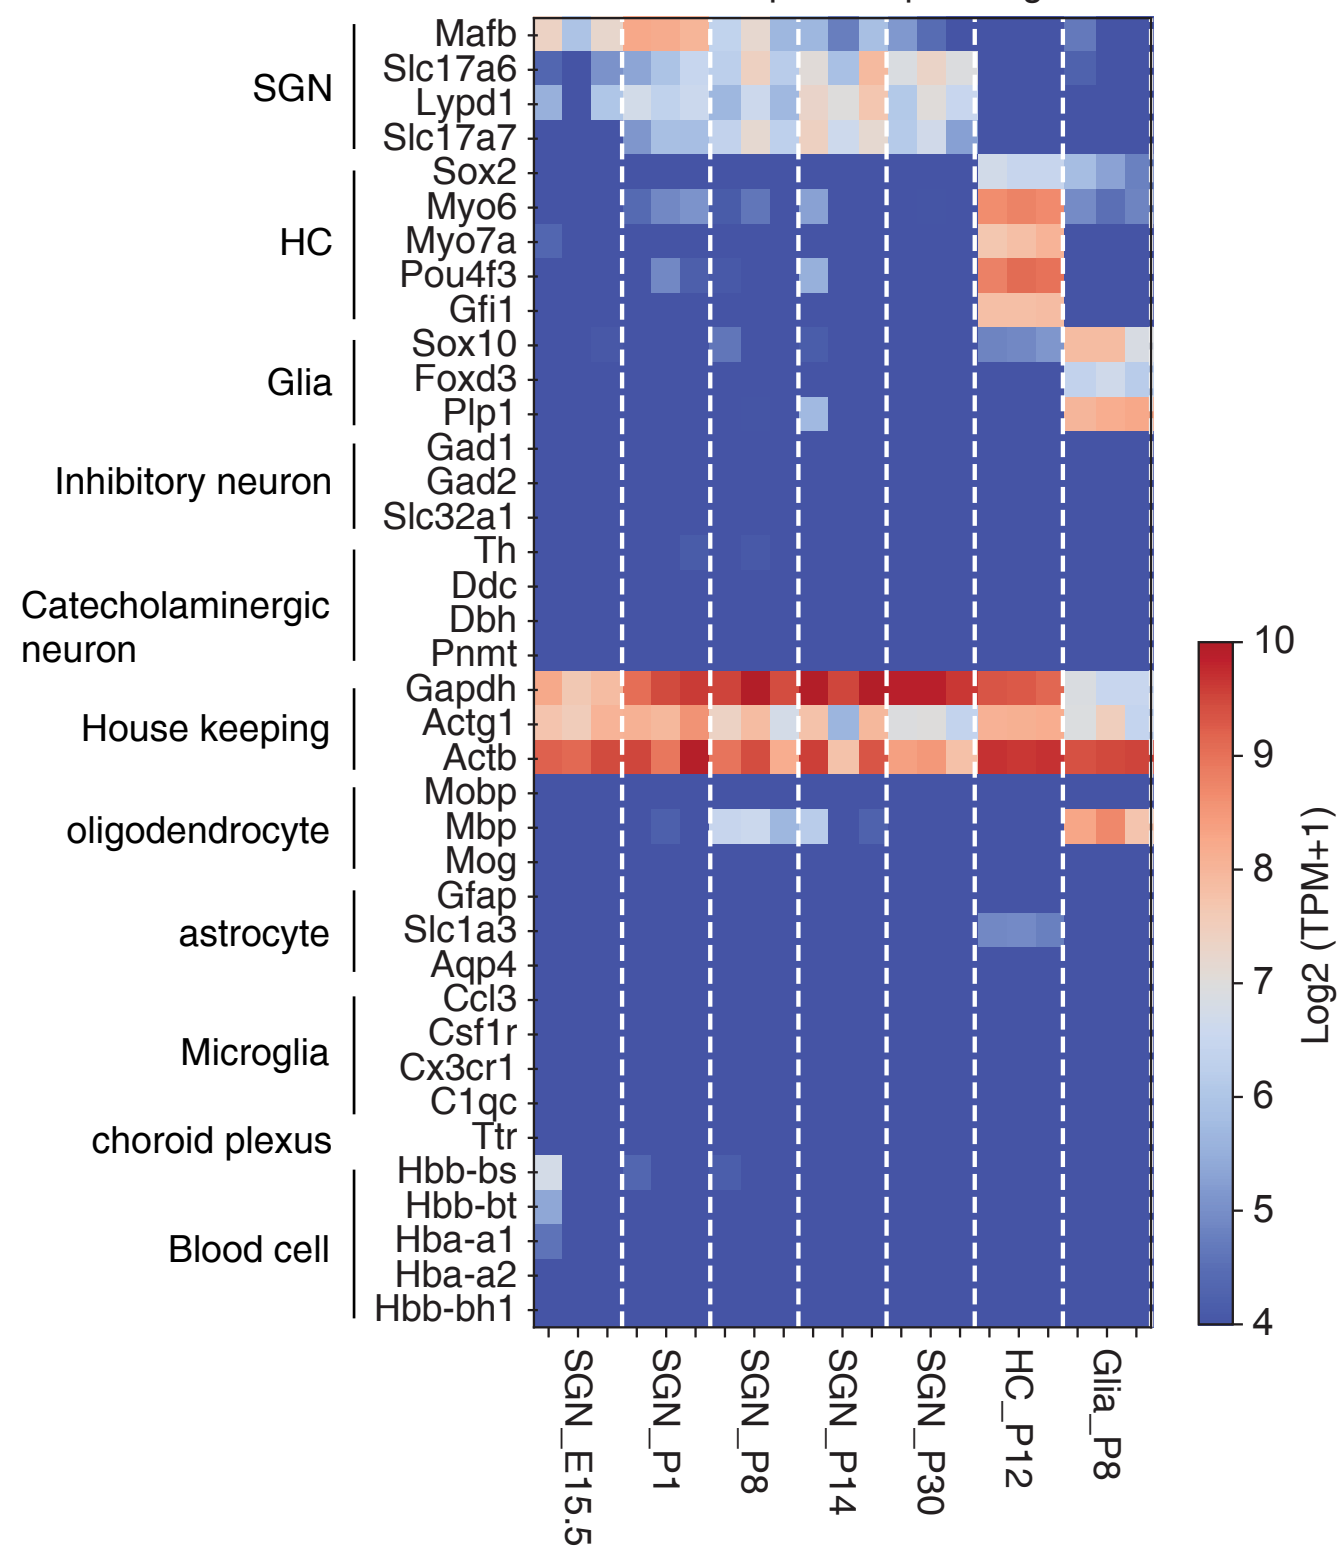

Supplement: supp [file elife-50491-supp-v1.zip]

Figure 2-figure supplement 1

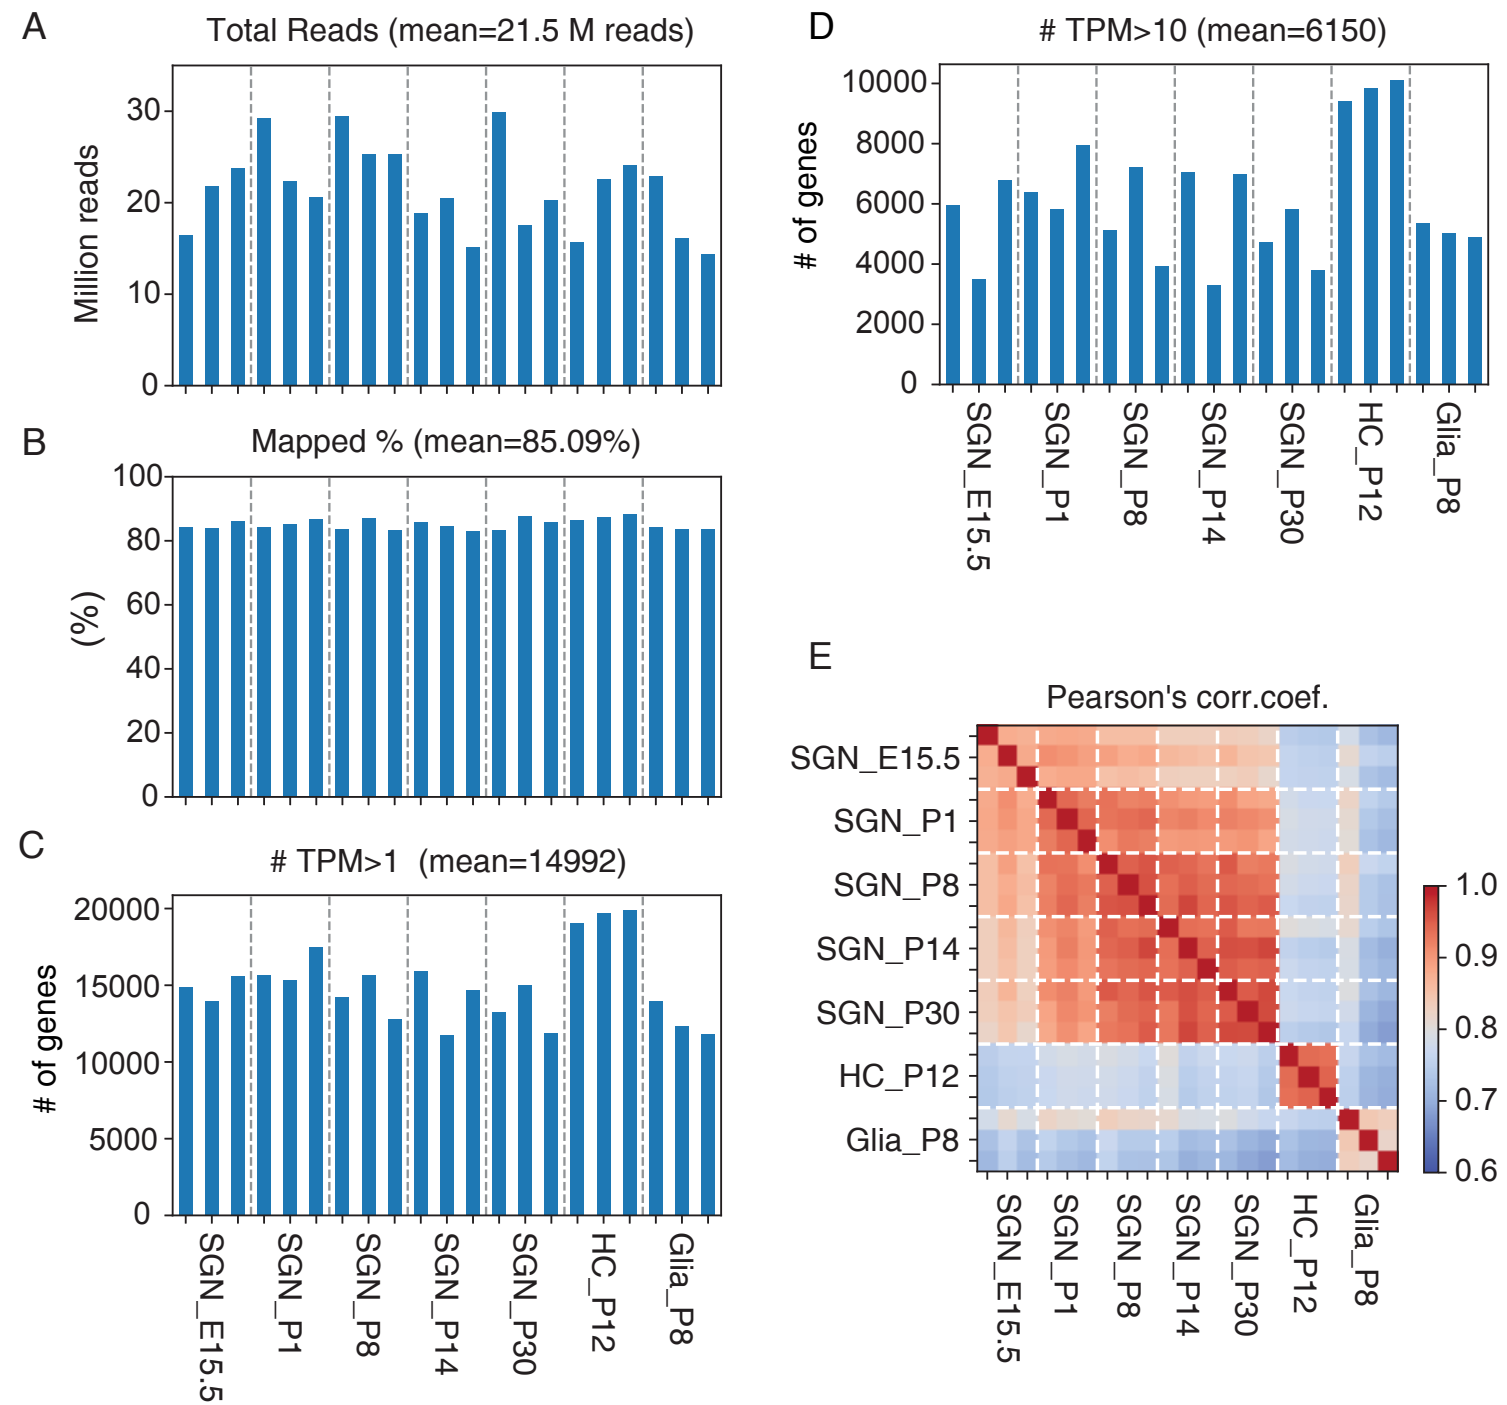

Supplement: supp [file elife-50491-supp-v1.zip]

Figure 2-figure supplement 3

Specific with constant pattern

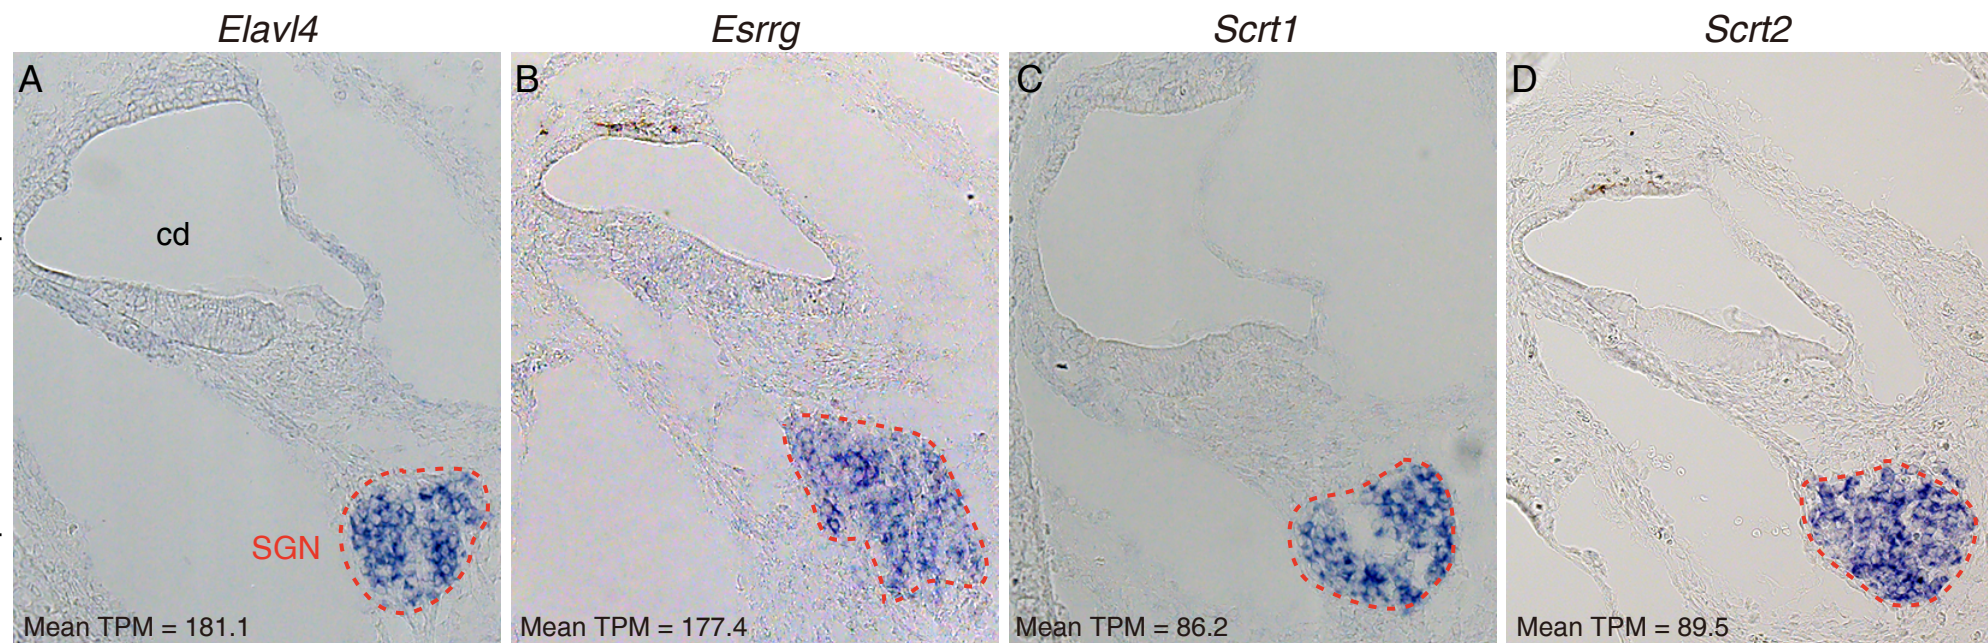

Specific with dynamic pattern

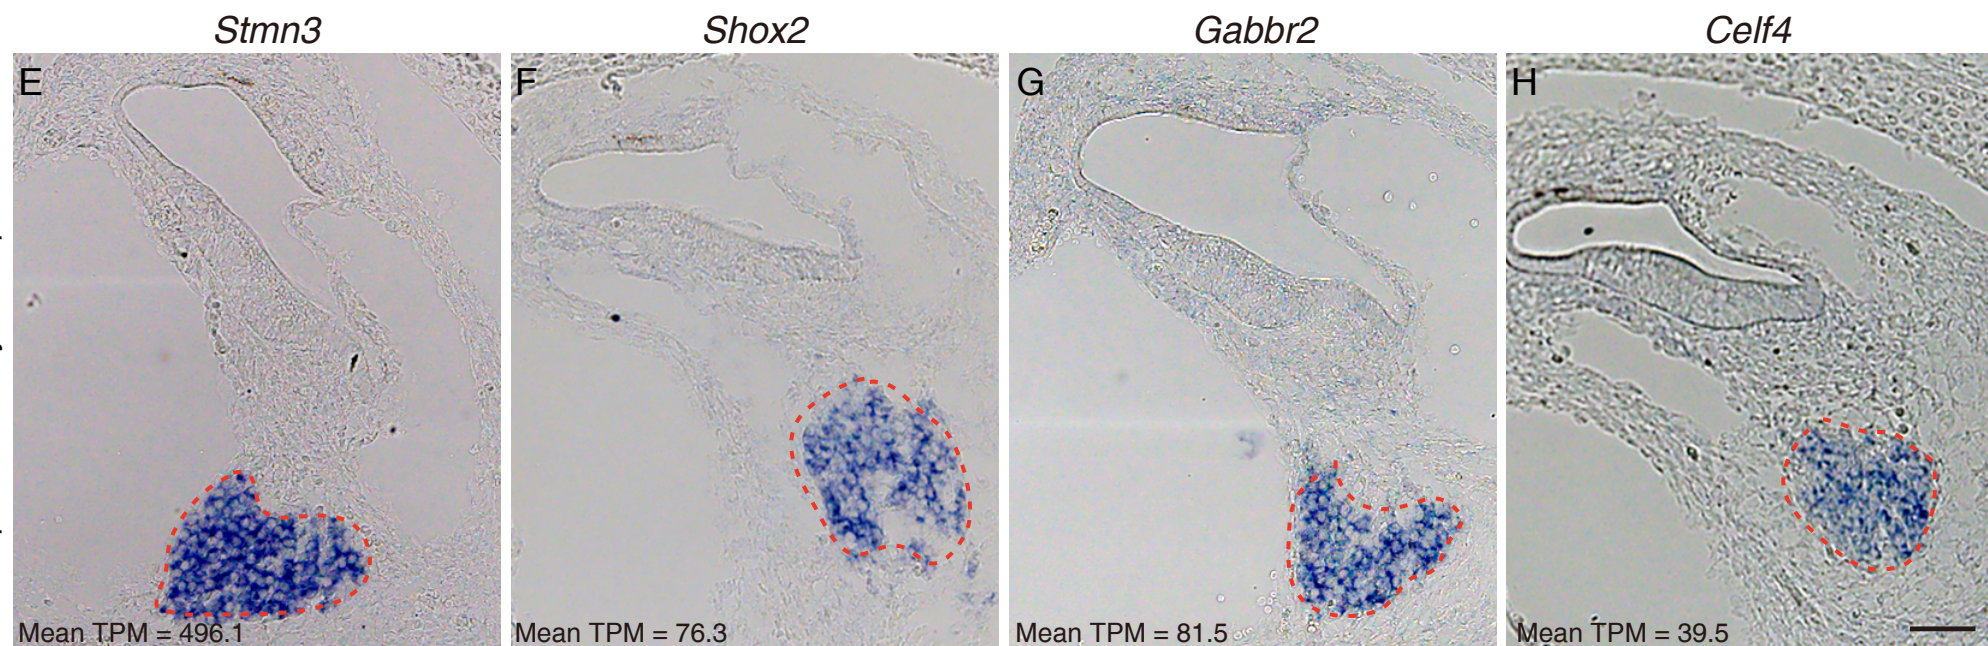

P1

Supplement: supp [file elife-50491-supp-v1.zip]

Figure 6-figure supplement 2

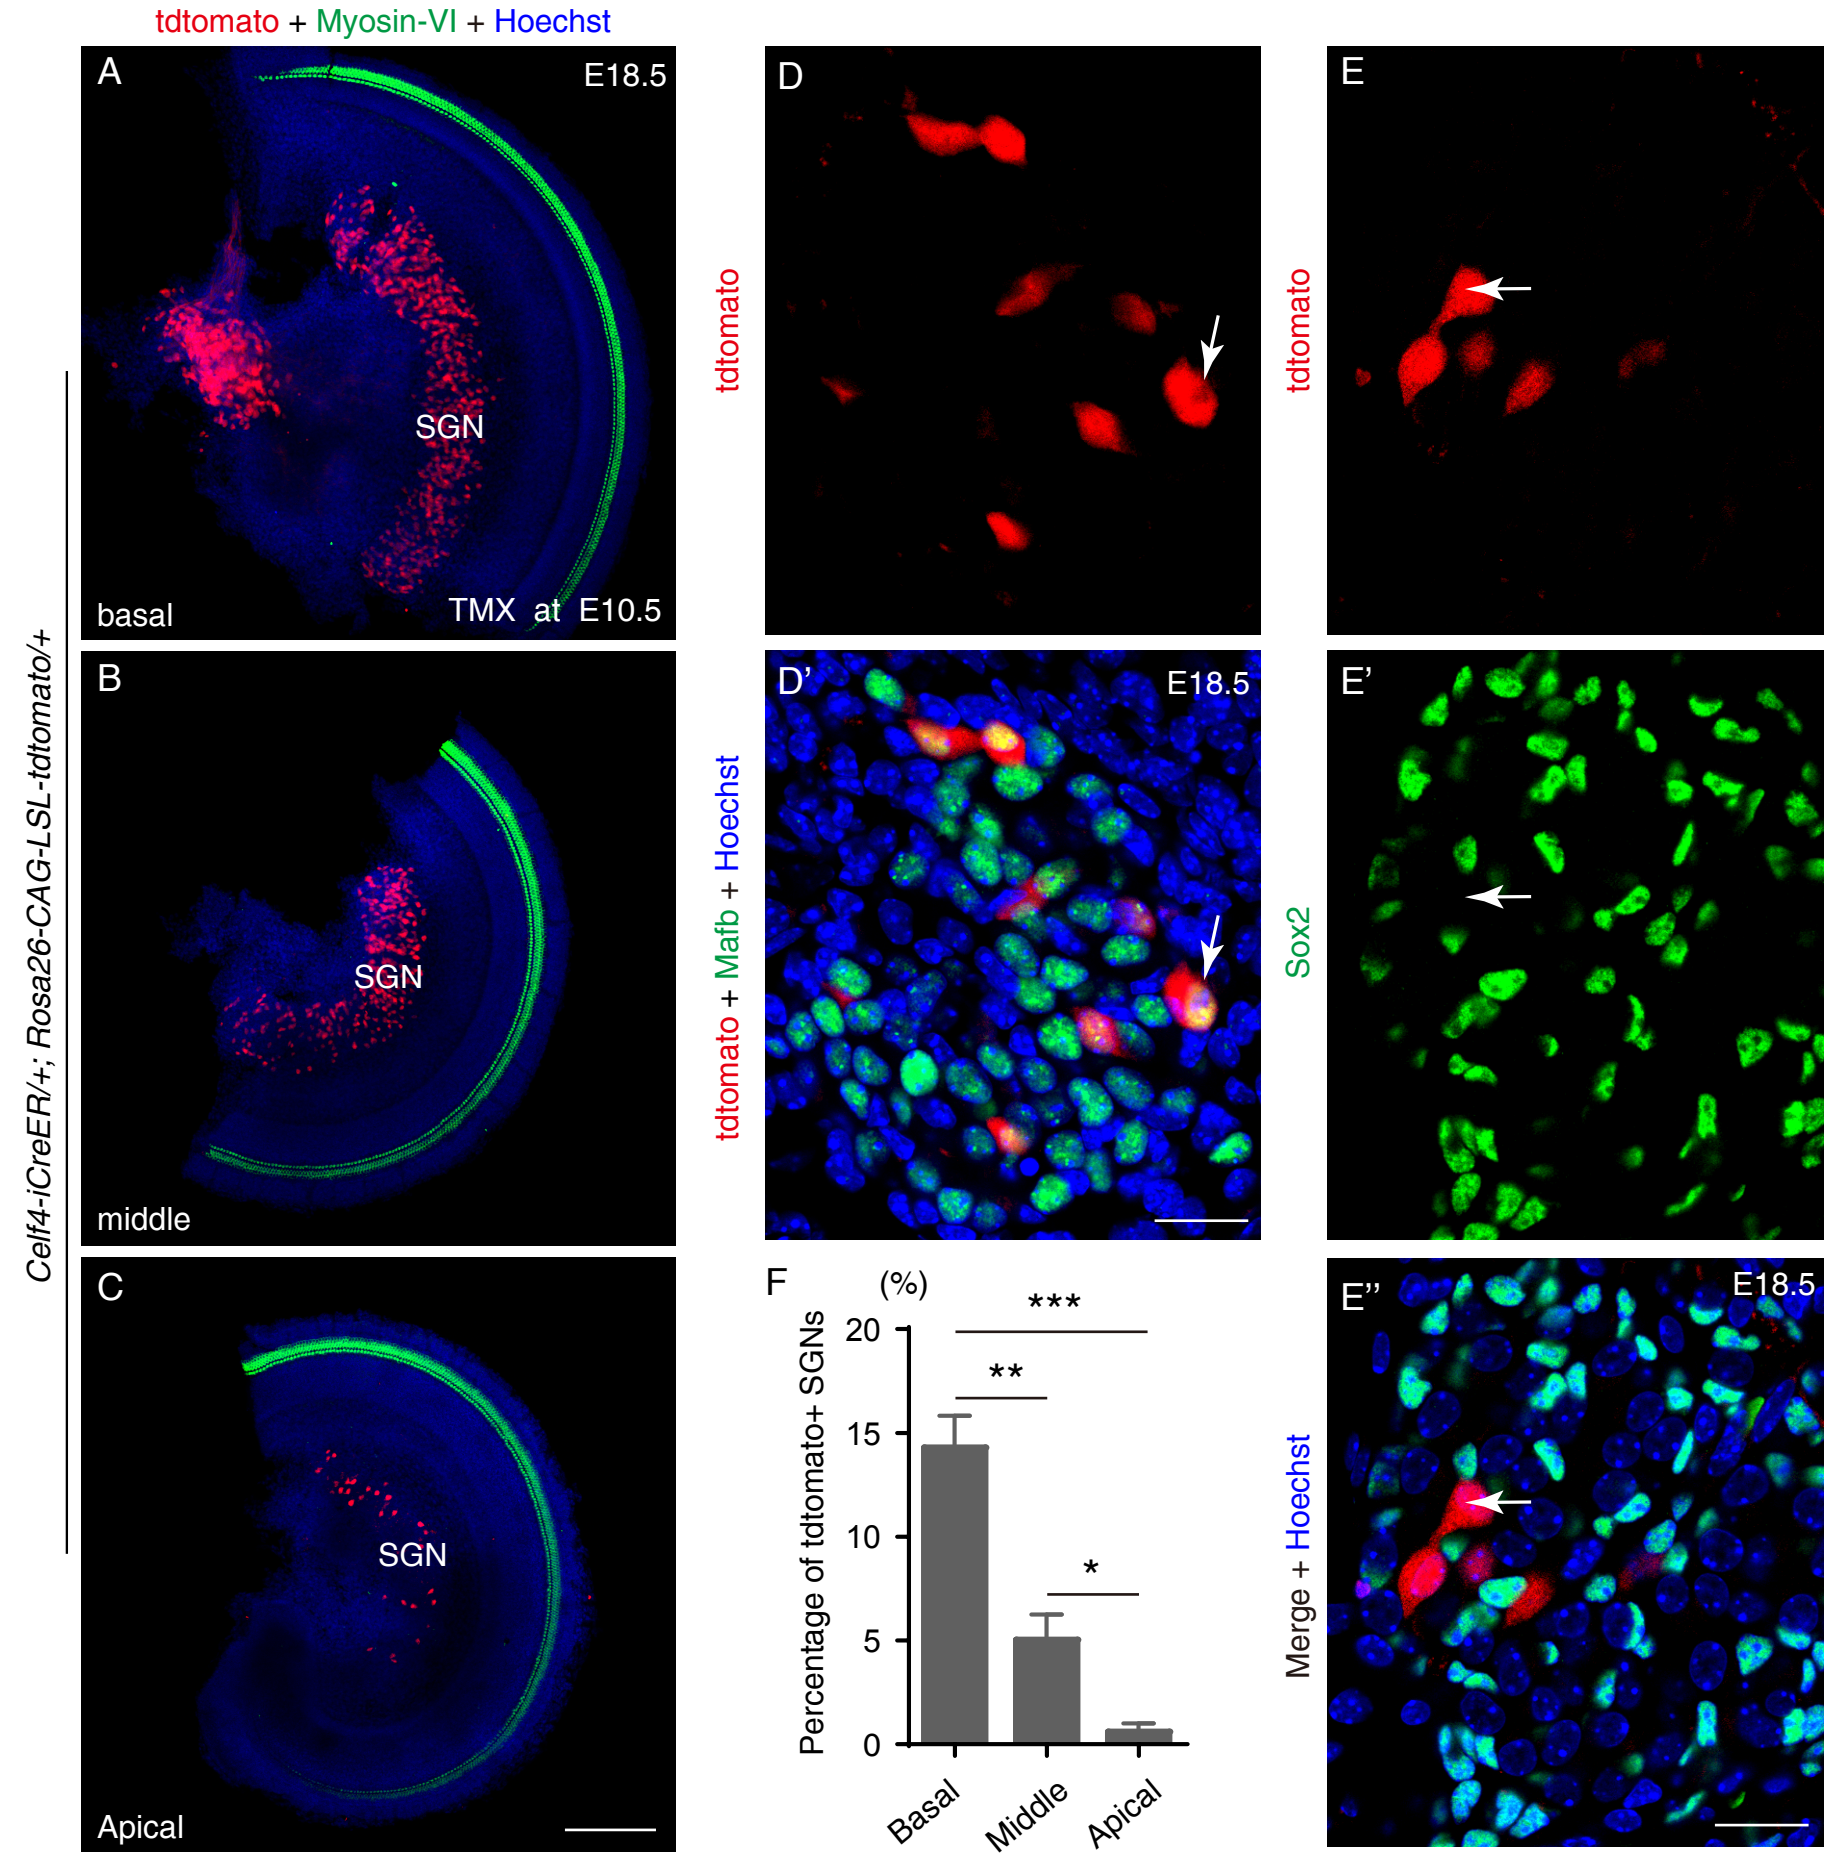

Supplement: supp [file elife-50491-supp-v1.zip]

Figure 1-figure supplement 1

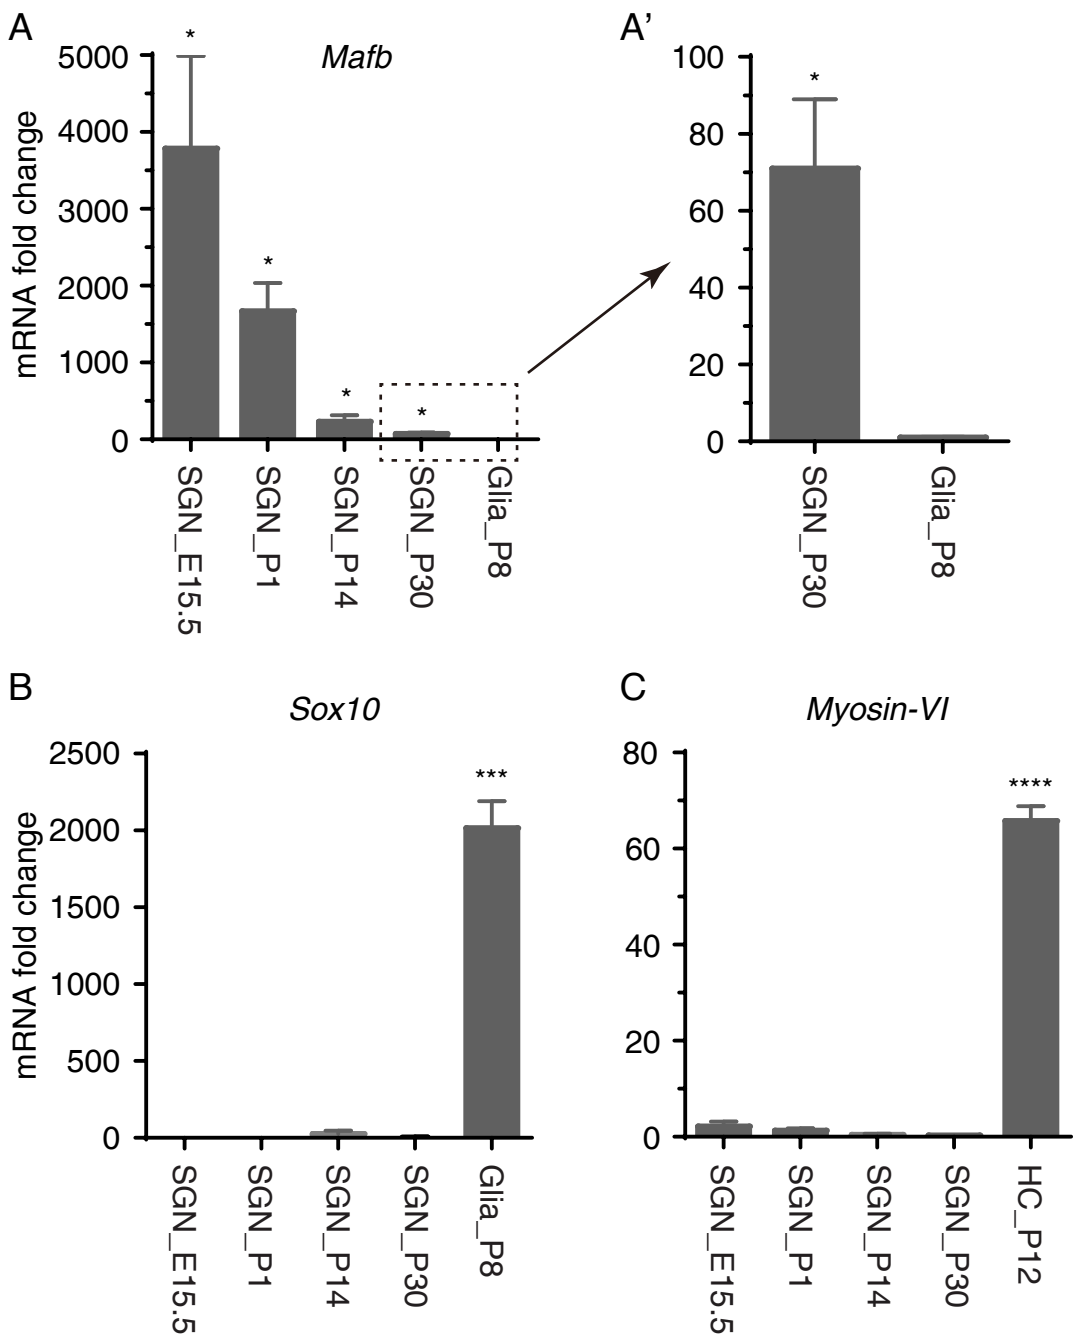

Supplement: supp [file elife-50491-supp-v1.zip]

Figure 6-figure supplement 1

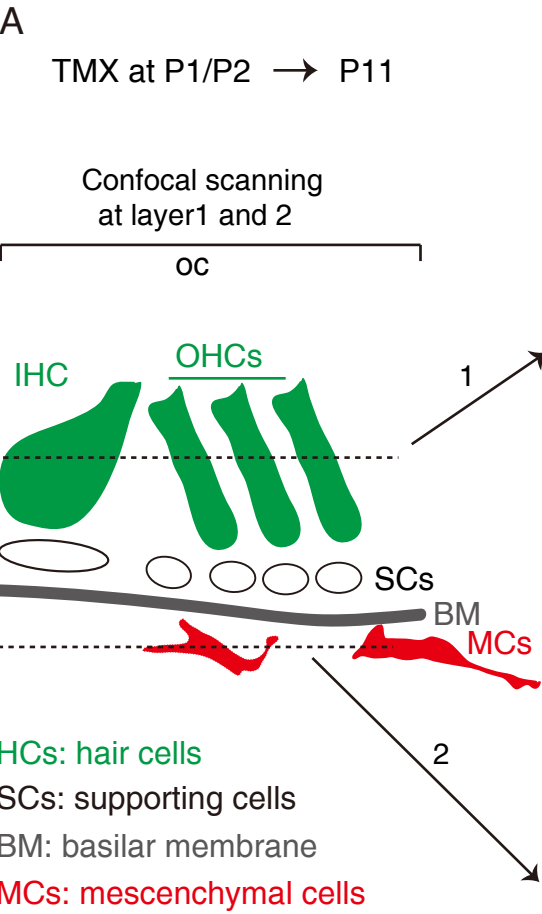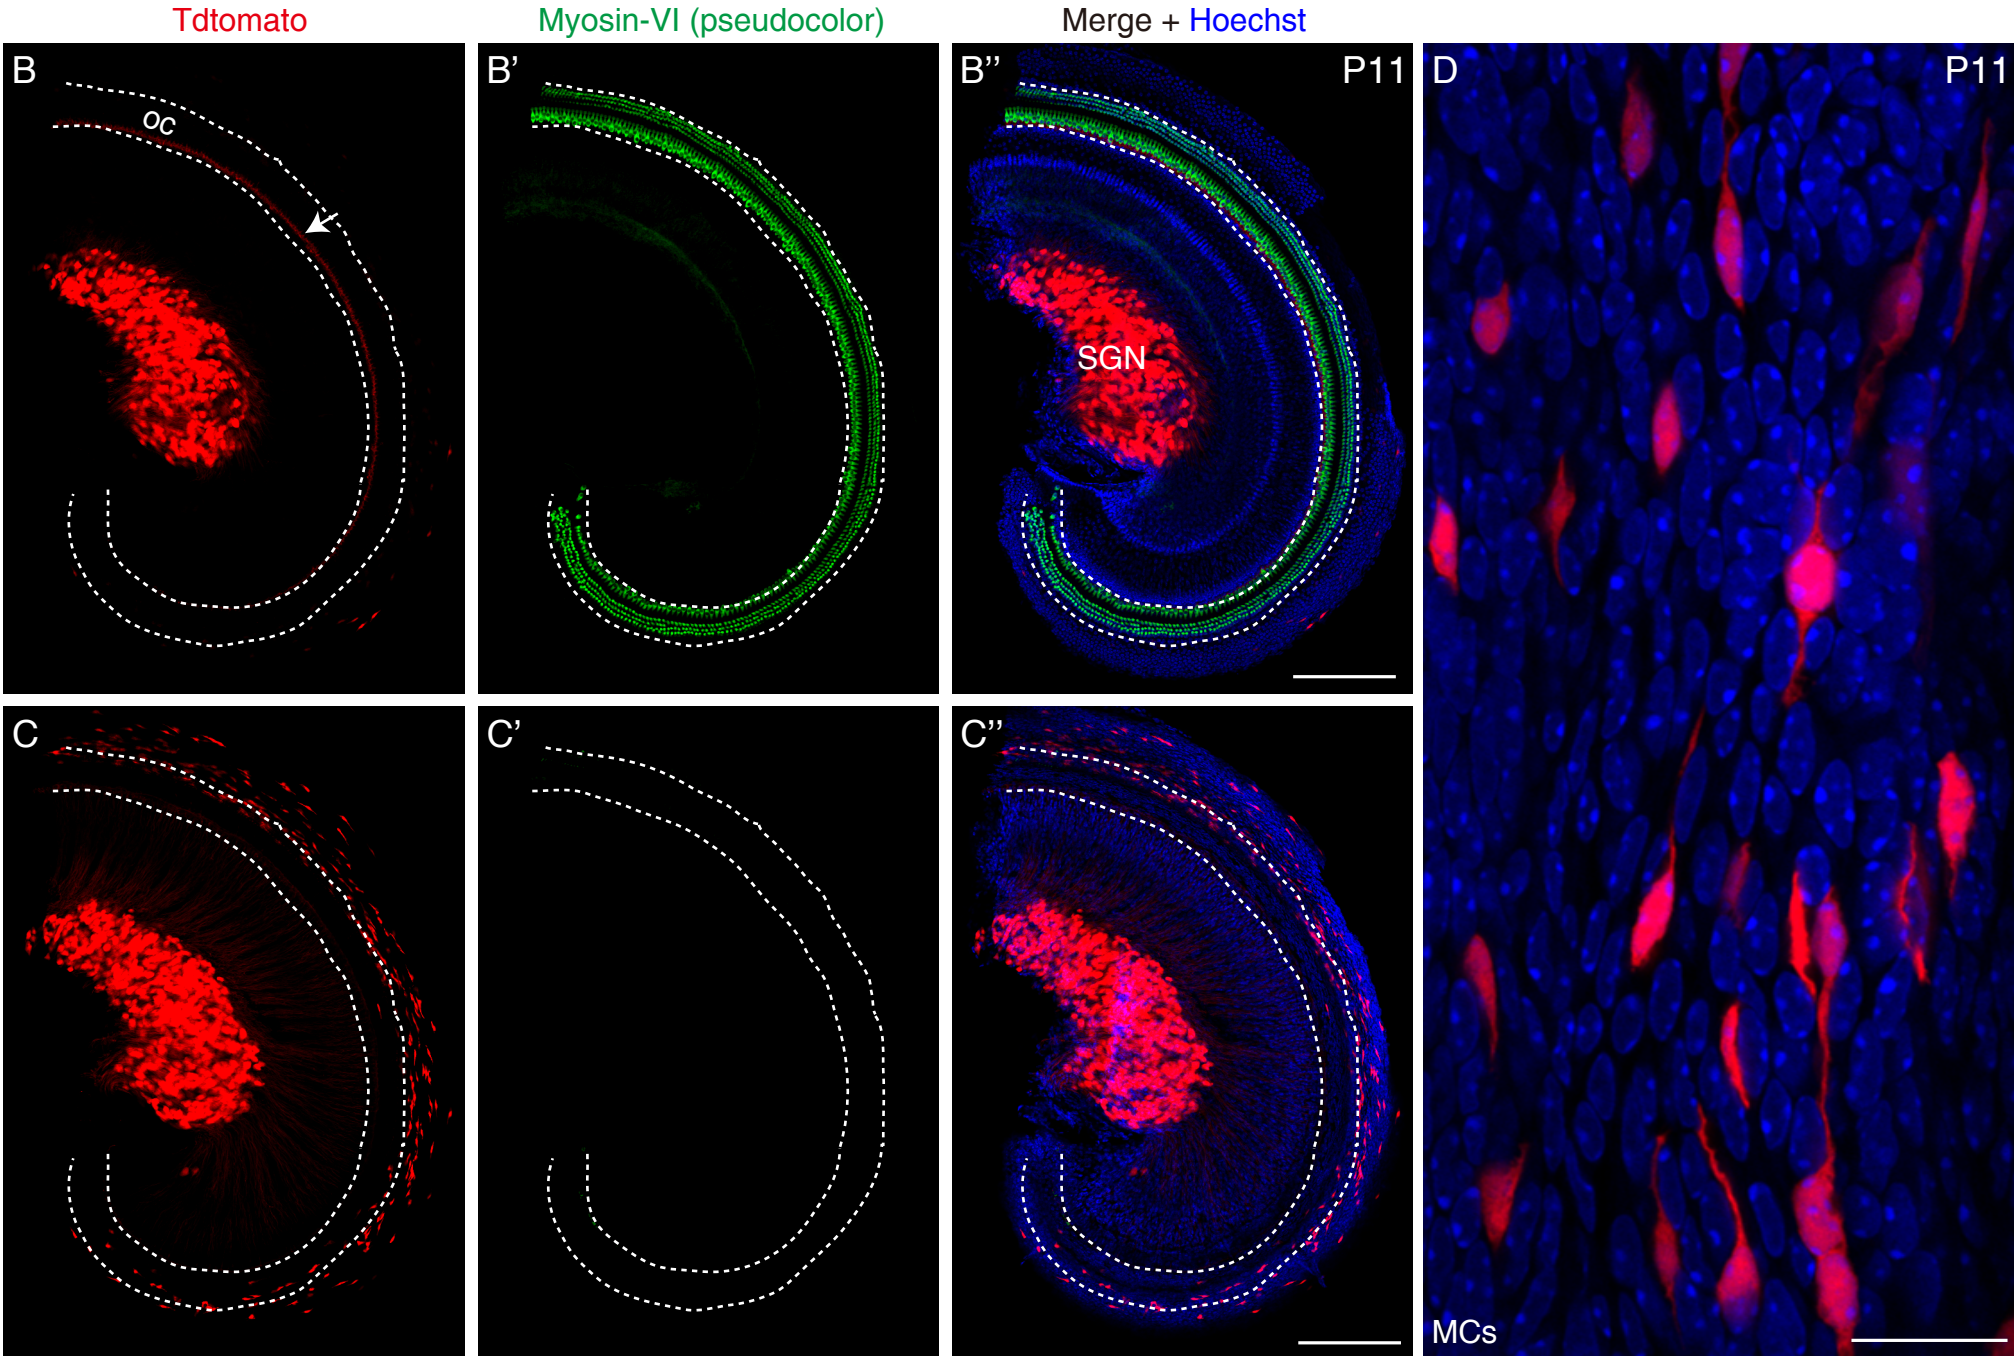

Supplement: supp [file elife-50491-supp-v1.zip]

Figure 5-figure supplement 1

A

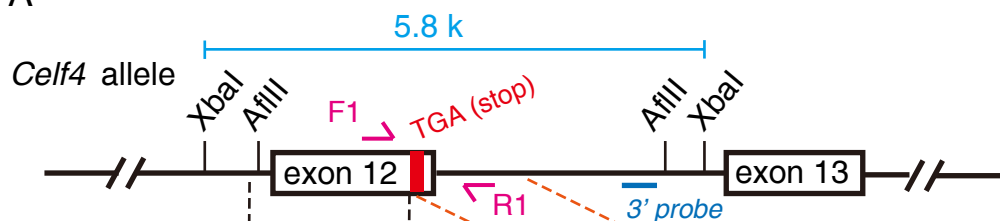

B

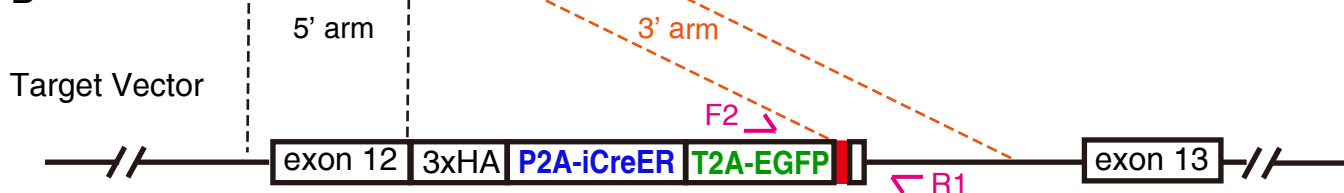

C

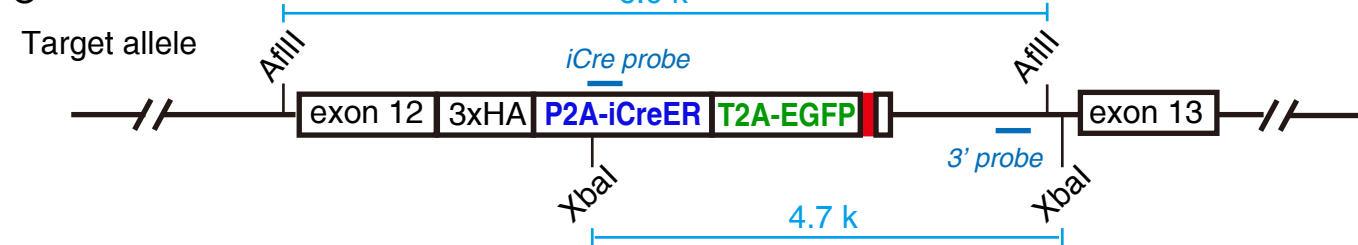

D

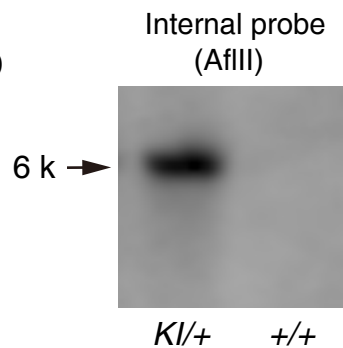

E

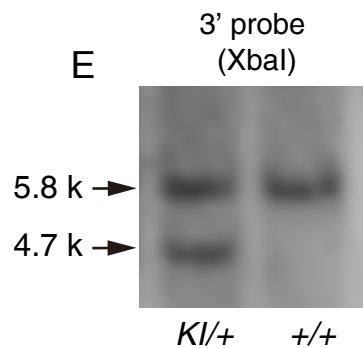

F

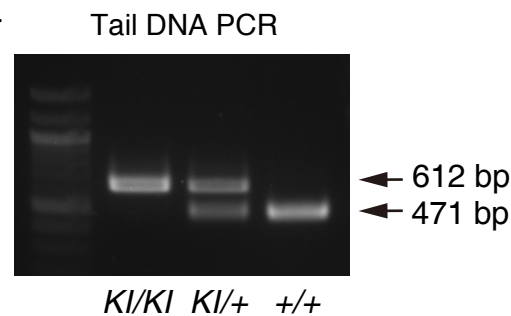

Supplement: supp [file elife-50491-supp-v1.zip]

Figure 4-figure supplement 2

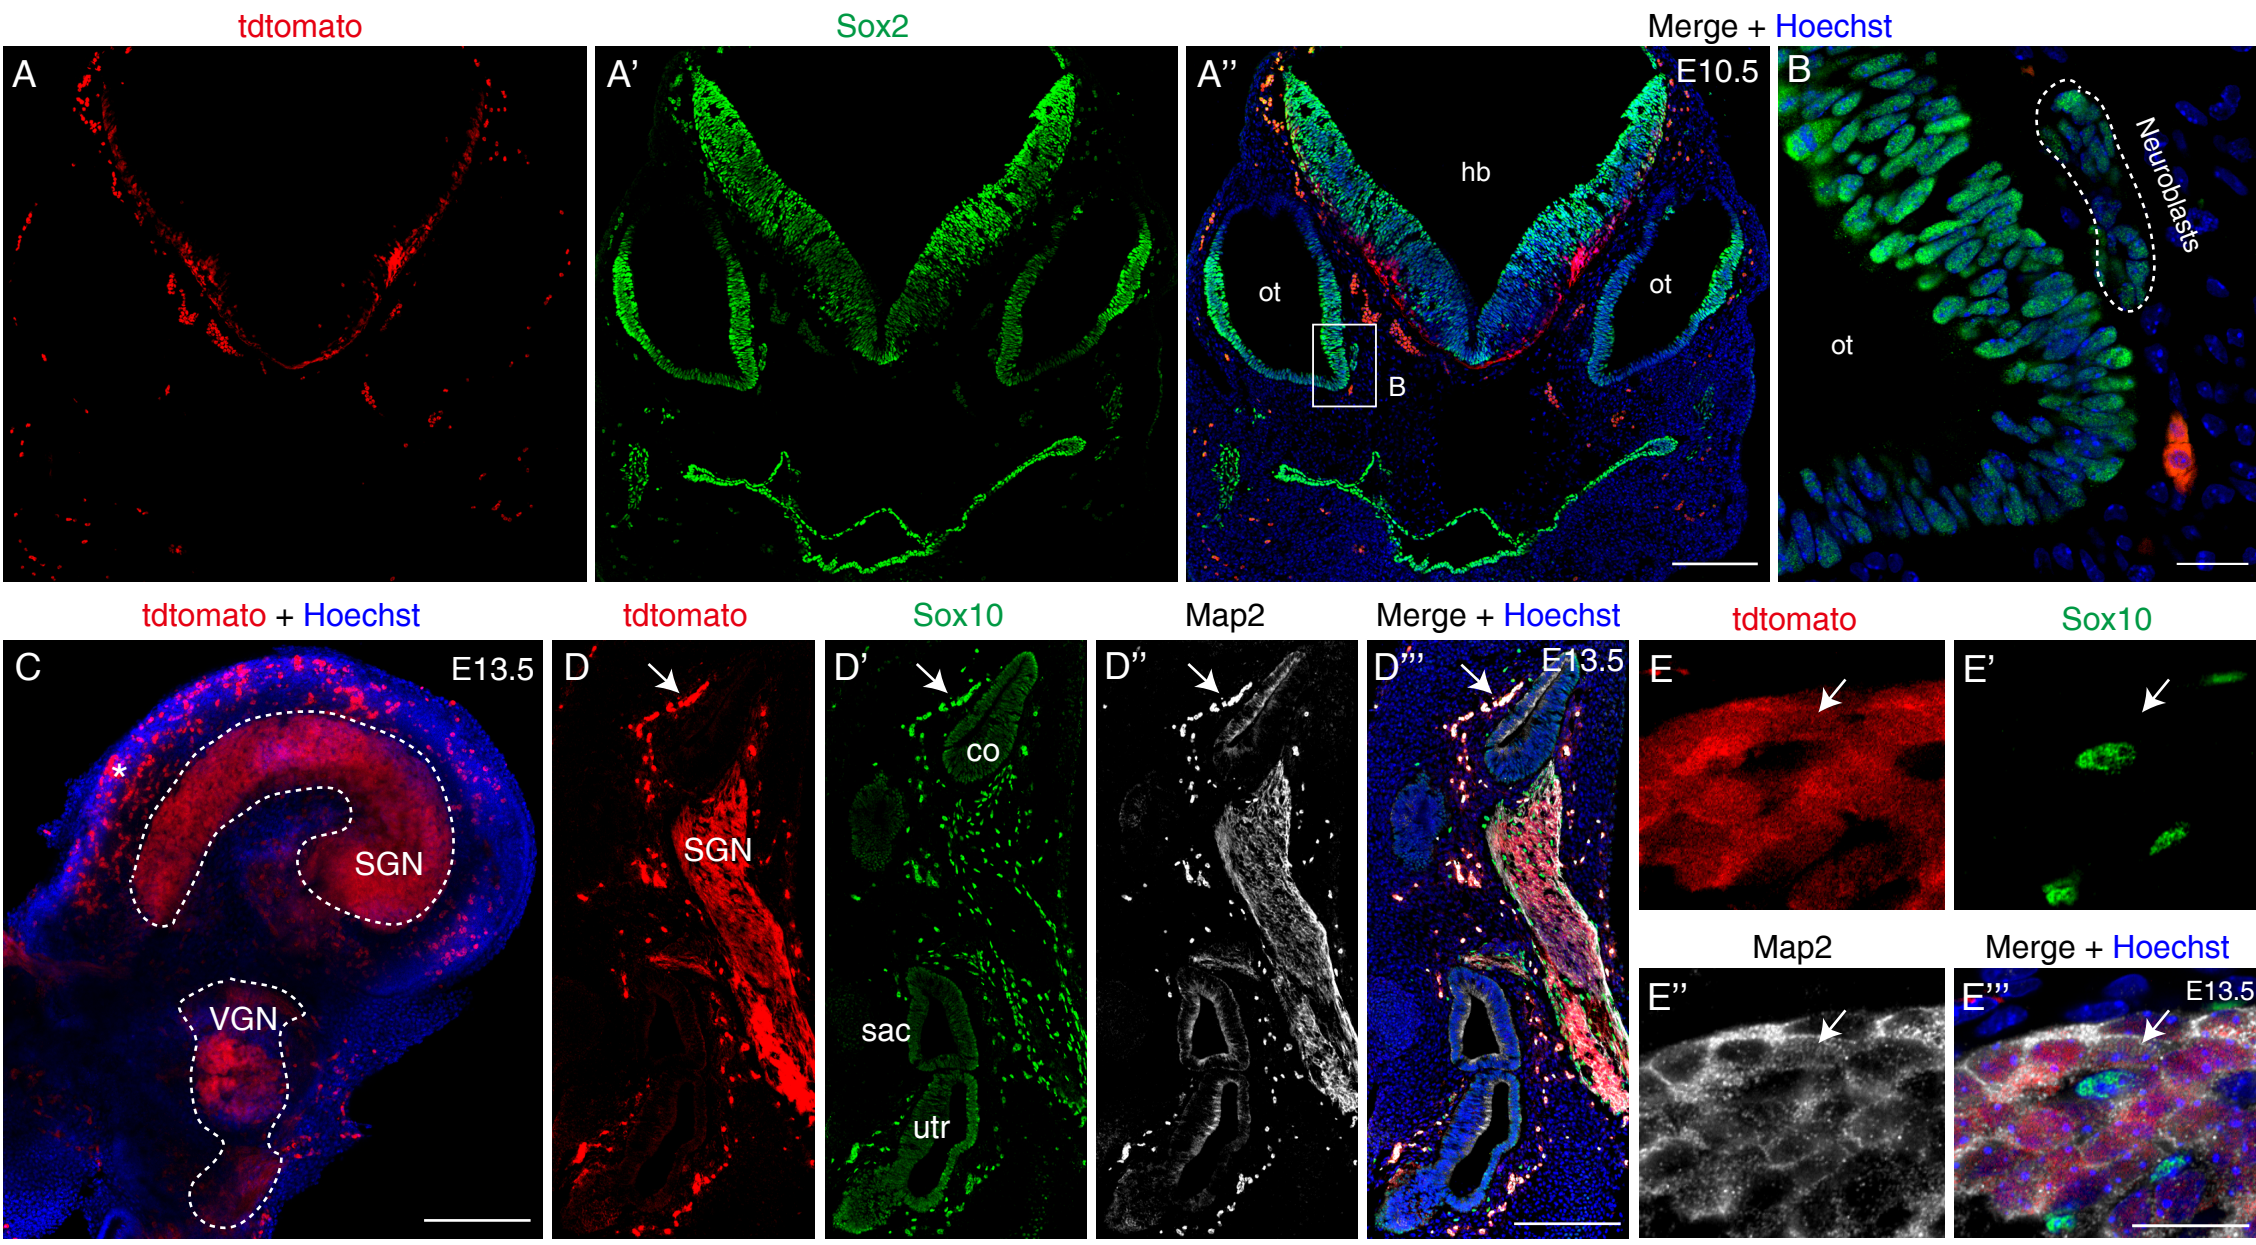

Supplement: supp [file elife-50491-supp-v1.zip]

Figure 7-figure supplement 1

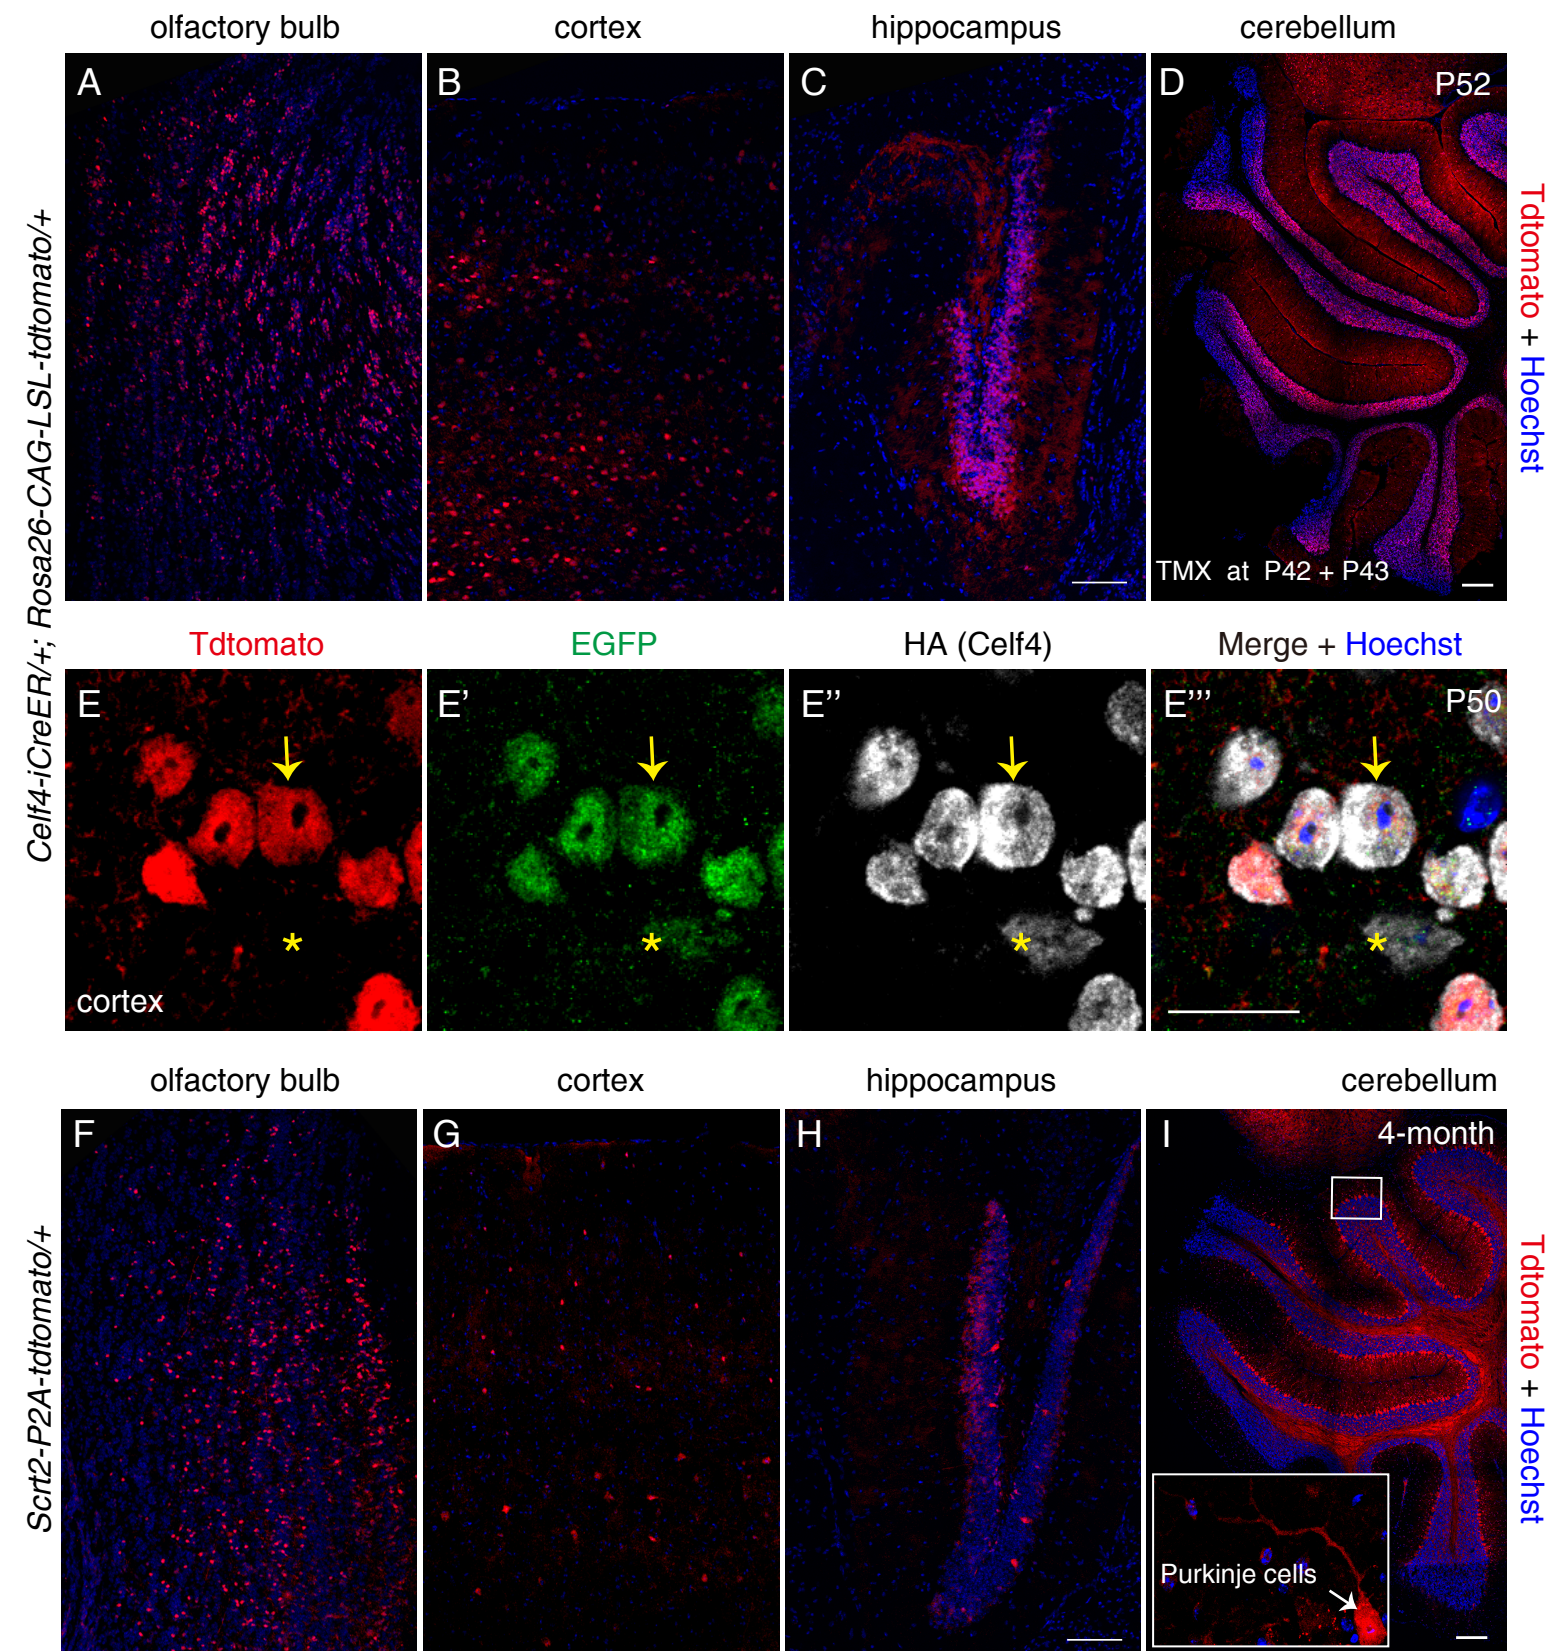

Supplement: supp [file elife-50491-supp-v1.zip]
